# Supplementary material for: Discovery of imeglimin-inspired novel 1,3,5-triazine derivatives as antidiabetic agents in streptozotocin-induced diabetes in Wistar rats via inhibition of DPP-4
Source: Royal Society of Chemistry journal article supplement (doi:10.1039/d3md00085k), 2023-01-01
Supplement: d3md00085k1.pdf [file d3md00085k1.pdf]

#### SUPPLEMENTARY DATA

### Discovery of Imeglimin-inspired novel 1,3,5-triazine derivatives as an antidiabetic agent in Streptozotocin-induced Diabetes in Wistar rats via inhibition of DPP-4

Akanksha Gupta<sup>1,2</sup>, Hans Raj Bhat<sup>3</sup>, Udaya Pratap Singh<sup>1\*</sup>

<sup>1</sup> Drug Design and Discovery Laboratory, Department of Pharmaceutical Sciences, Shalom Institute of Health Sciences, Sam Higginbottom University of Agriculture, Technology and Sciences, Prayagraj, Uttar Pradesh, India 211007

<sup>2</sup> United Institute of Pharmacy, Prayagraj, Uttar Pradesh, India 211008

<sup>3</sup> Department of Pharmaceutical Sciences, Dibrugarh University, Dibrugarh Assam, India 786004

Corresponding Author

Udaya Pratap Singh

Email: [udaya.singh@shiats.edu.in](mailto:udaya.singh@shiats.edu.in); [udaysingh98@gmail.com](mailto:udaysingh98@gmail.com)

#### PRELIMINARY DATA OF THE INTERMEDIATES

*4,6-Dichloro-[1,3,5]triazin-2-ylamine (2)*: Yield: 82%; *M.P.*: 157 °C; *R<sub>f</sub>*: 0.87, Mobile phase; toluene: acetone (7:3)

*4-Chloro-6-morpholin-4-yl-[1,3,5]triazin-2-ylamine (3)*: Yield: 78%; *M.P.*: 172-173 °C; *R<sub>f</sub>*: 0.93, Mobile phase; toluene: acetone (7:3)

*4,6-diphenyl-6H-1,3-oxazin-2-amine (7a)*: Yield: 84%; *M.P.*: 220 °C; *R<sub>f</sub>*: 0.83, Mobile phase; ethyl acetate: toluene (7:3)

*6-(2-nitrophenyl)-4-phenyl-6H-1,3-oxazin-2-amine (7b)*: Yield: 88%; *M.P.*: 226 °C; *R<sub>f</sub>*: 0.87, Mobile phase; ethyl acetate: toluene (7:3)

6-(3-nitrophenyl)-4-phenyl-6H-1,3-oxazin-2-amine (**7c**): Yield: 78%; *M.P.*: 210 °C; *R<sub>f</sub>*: 0.76, Mobile phase; ethyl acetate: toluene (7:3)

6-(4-nitrophenyl)-4-phenyl-6H-1,3-oxazin-2-amine (**7d**): Yield: 75%; *M.P.*: 225 °C; *R<sub>f</sub>*: 0.84, Mobile phase; ethyl acetate: toluene (7:3)

2-(2-amino-4-phenyl-6H-1,3-oxazin-6-yl)phenol (**7e**): Yield: 86%; *M.P.*: 228 °C; *R<sub>f</sub>*: 0.88, Mobile phase; ethyl acetate: toluene (7:3)

3-(2-amino-4-phenyl-6H-1,3-oxazin-6-yl)phenol (**7f**): Yield: 80%; *M.P.*: 210 °C; *R<sub>f</sub>*: 0.86, Mobile phase; ethyl acetate: toluene (7:3)

4-(2-amino-4-phenyl-6H-1,3-oxazin-6-yl)phenol (**7g**): Yield: 85%; *M.P.*: 225 °C; *R<sub>f</sub>*: 0.78, Mobile phase; ethyl acetate: toluene (7:3)

6-(2-chlorophenyl)-4-phenyl-6H-1,3-oxazin-2-amine (**7h**): Yield: 82%; *M.P.*: 226 °C; *R<sub>f</sub>*: 0.89, Mobile phase; ethyl acetate: toluene (7:3)

6-(3-chlorophenyl)-4-phenyl-6H-1,3-oxazin-2-amine (**7i**): Yield: 76%; *M.P.*: 210 °C; *R<sub>f</sub>*: 0.73, Mobile phase; ethyl acetate: toluene (7:3)

6-(4-chlorophenyl)-4-phenyl-6H-1,3-oxazin-2-amine (**7j**): Yield: 89%; *M.P.*: 218 °C; *R<sub>f</sub>*: 0.78, Mobile phase; ethyl acetate: toluene (7:3)

4-phenyl-6-(*o*-tolyl)-6H-1,3-oxazin-2-amine (**7k**): Yield: 84%; *M.P.*: 228 °C; *R<sub>f</sub>*: 0.87, Mobile phase; ethyl acetate: toluene (7:3)

4-phenyl-6-(*m*-tolyl)-6H-1,3-oxazin-2-amine (**7l**): Yield: 92%; *M.P.*: 230 °C; *R<sub>f</sub>*: 0.88, Mobile phase; ethyl acetate: toluene (7:3)

*4-phenyl-6-(p-tolyl)-6H-1,3-oxazin-2-amine (7m)*: Yield: 90%; *M.P.*: 225 °C; *R<sub>f</sub>*: 0.87, Mobile phase; ethyl acetate: toluene (7:3)

## CPCSEA certificate for animal ethical approval

**UNITED INSTITUTE OF PHARMACY, UCER**

A-31/1, UPSIDC Industrial Area, Naini, Allahabad - 211010  
Ph. : 0532 - 2101568, 2101569

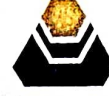

### INSTITUTIONAL ANIMAL ETHICS COMMITTEE (IAEC)

REG. No. - 1451/PO/Re/S/11/CPCSEA Dated 16/06//2017 UNDER RULE 13 OF THE  
"BREEDING OF AND EXPERIMENTS ON ANIMALS (CONTROL AND  
SUPERVISION) RULES 1998"

UIP/IAEC/Nov.-2021/10

DATE: 05/12/2021

### CERTIFICATE

This is to certify that Ms. Akanksha Gupta, a research scholar (I. D. No. 15PHPS102) is permitted to carry out experiments for the thesis work entitled "Synthesis, characterization and biological screening of novel nitrogen containing heterocyclic compounds." as per the details mentioned and after observing the usual formalities laid down by IAEC as per the provisions made by CPCSEA.

  
MEMBER SECRETARY

  
CHAIRMAN

Affiliated to :  
Dr. A.P.J. ABDUL KALAM TECHNICAL UNIVERSITY, LUCKNOW

Approved by :  
AICTE, MINISTRY OF HRD, GOVT. OF INDIA

Corporate Office : 53, Leader Road, Allahabad - 211003 Ph : 0532-2402951,54,55  
e-mail : info@united.ac.in web : http://www.united.ac.in

**DOCKING RESULT ANALYSIS OF COMPOUND 8 (a-m)**

| <b>Entry Name</b>                | <b>docking score</b> | <b>glide_gscore</b> | <b>glide energy</b> |
|----------------------------------|----------------------|---------------------|---------------------|
| 8a                               | -7.032               | -7.032              | -65.324             |
| 8b                               | -8.213               | -8.213              | -76.776             |
| 8c                               | -8.956               | -8.956              | -78.546             |
| 8d                               | -8.814               | -8.814              | -77.457             |
| 8e                               | -8.012               | -8.012              | -75.654             |
| 8f                               | -8.112               | -8.112              | -76.453             |
| 8g                               | -8.083               | -8.083              | -76.342             |
| 8h                               | -7.213               | -7.213              | -70.568             |
| 8i                               | -7.876               | -7.876              | -71.244             |
| 8j                               | -7.657               | -7.657              | -71.189             |
| 8k                               | -7.011               | -7.011              | -68.982             |
| 8l                               | -7.113               | -7.113              | -69.749             |
| 8m                               | -7.098               | -7.098              | -69.457             |
| Alogliptin<br>(Reference ligand) | -9.447               | -9.447              | -56.191             |

## DRUG-INTERACTION DIAGRAM

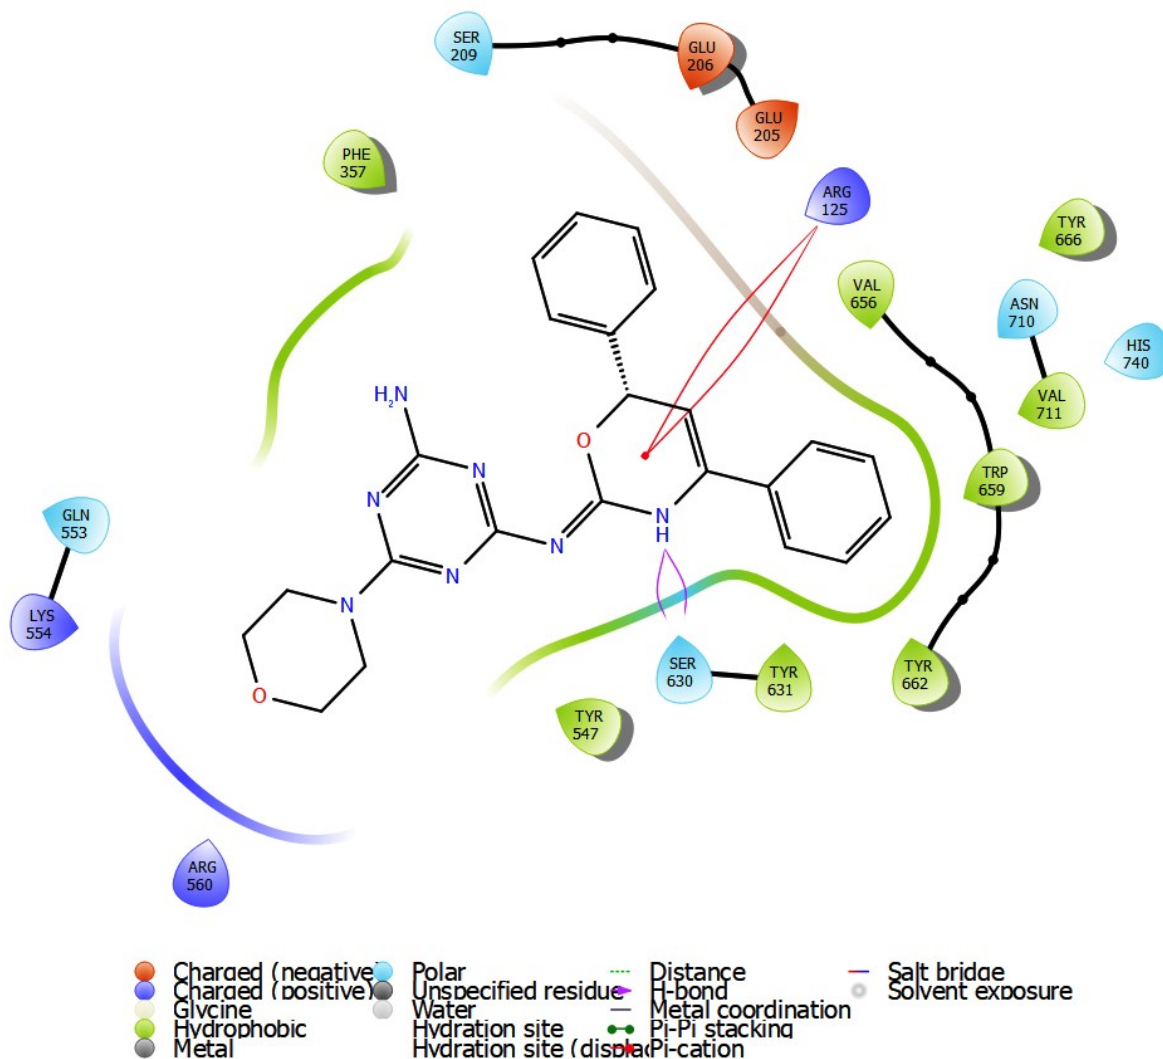

Figure SI 1: Drug-interaction diagram of compound 8(a)

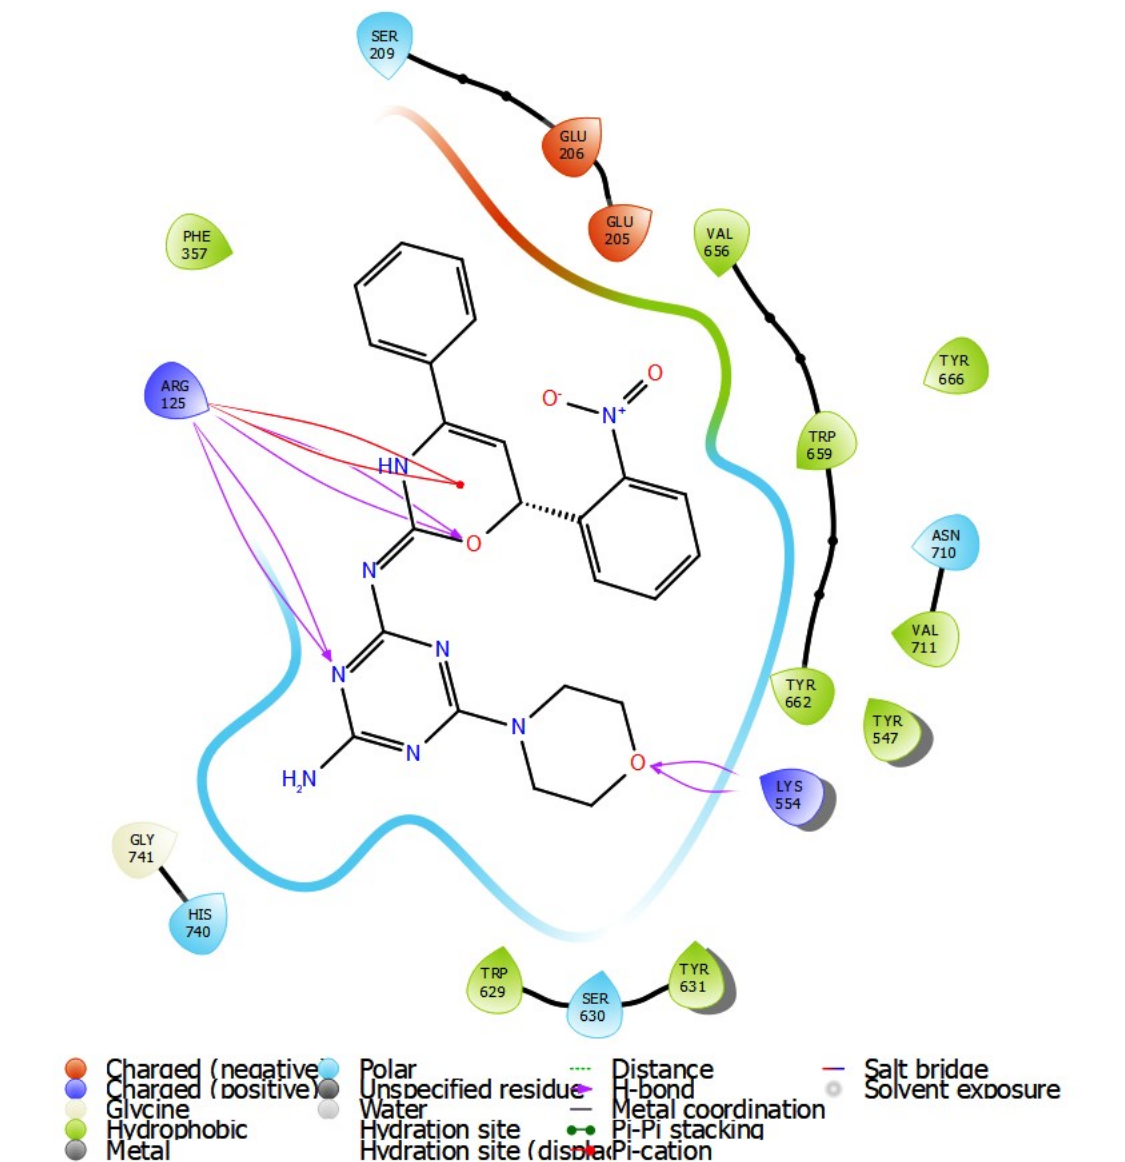

Figure SI 2: Drug-interaction diagram of compound 8(b)

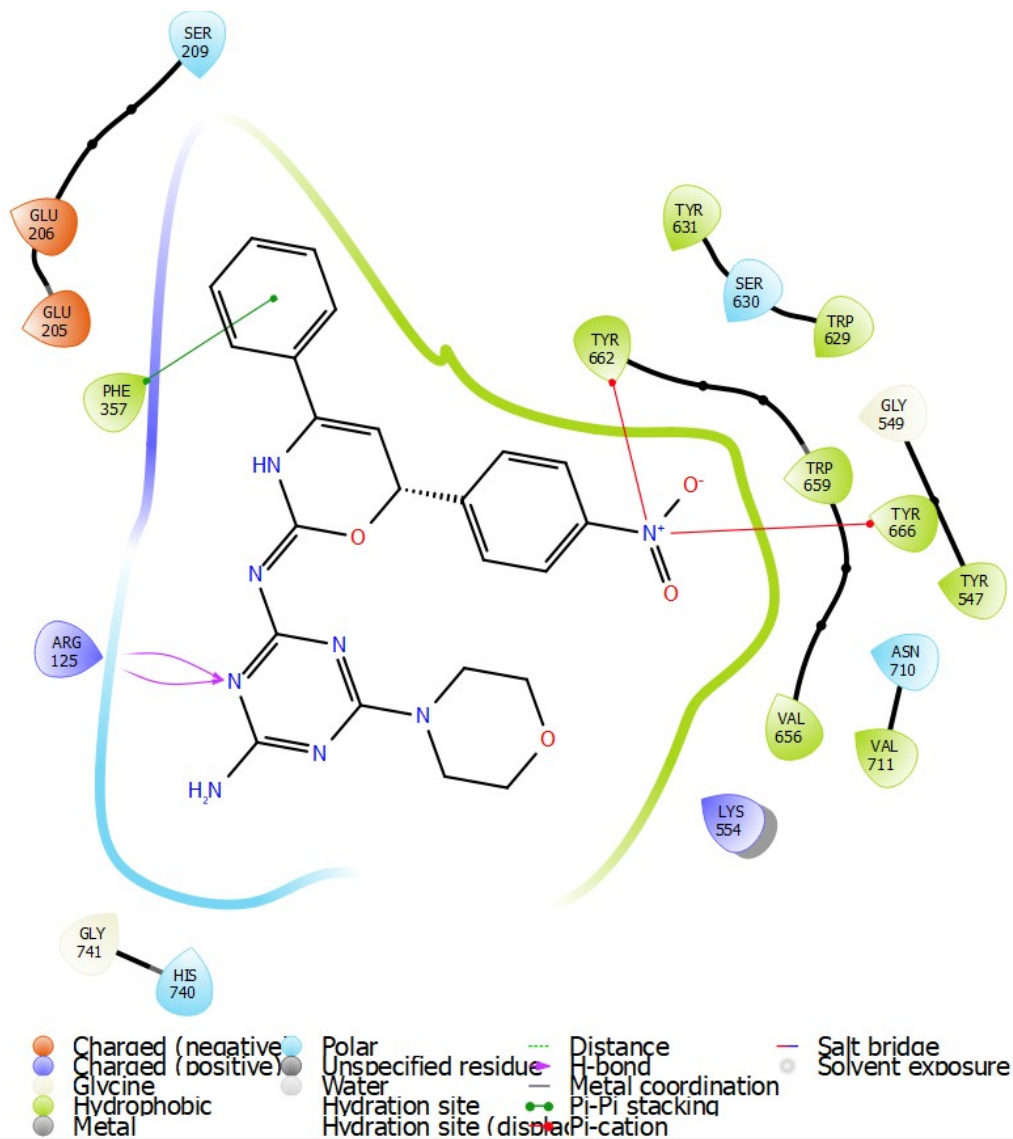

**Figure SI 3:** Drug-interaction diagram of compound 8(d)



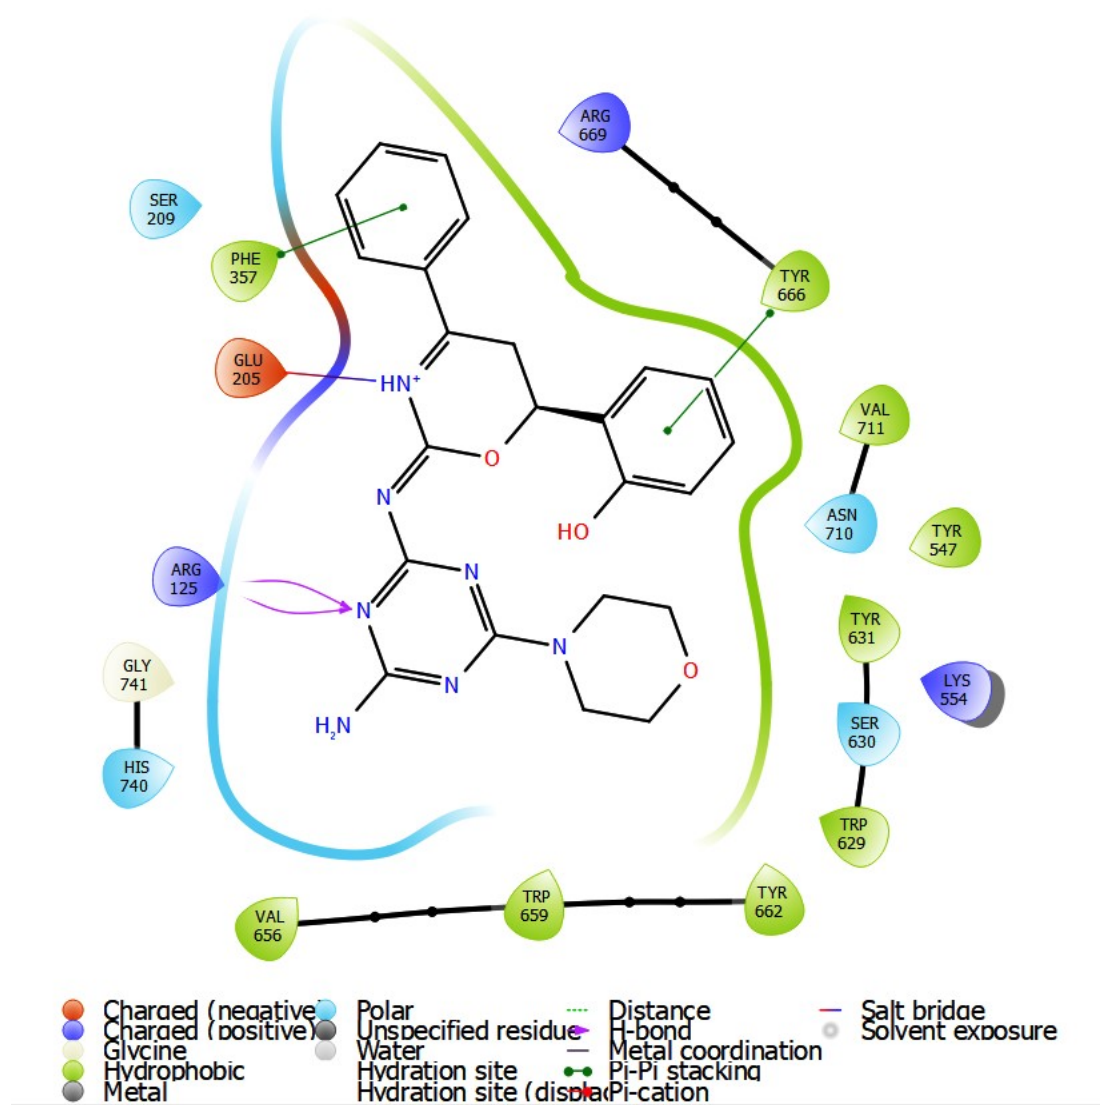

Figure SI 4: Drug-interaction diagram of compound 8(e)

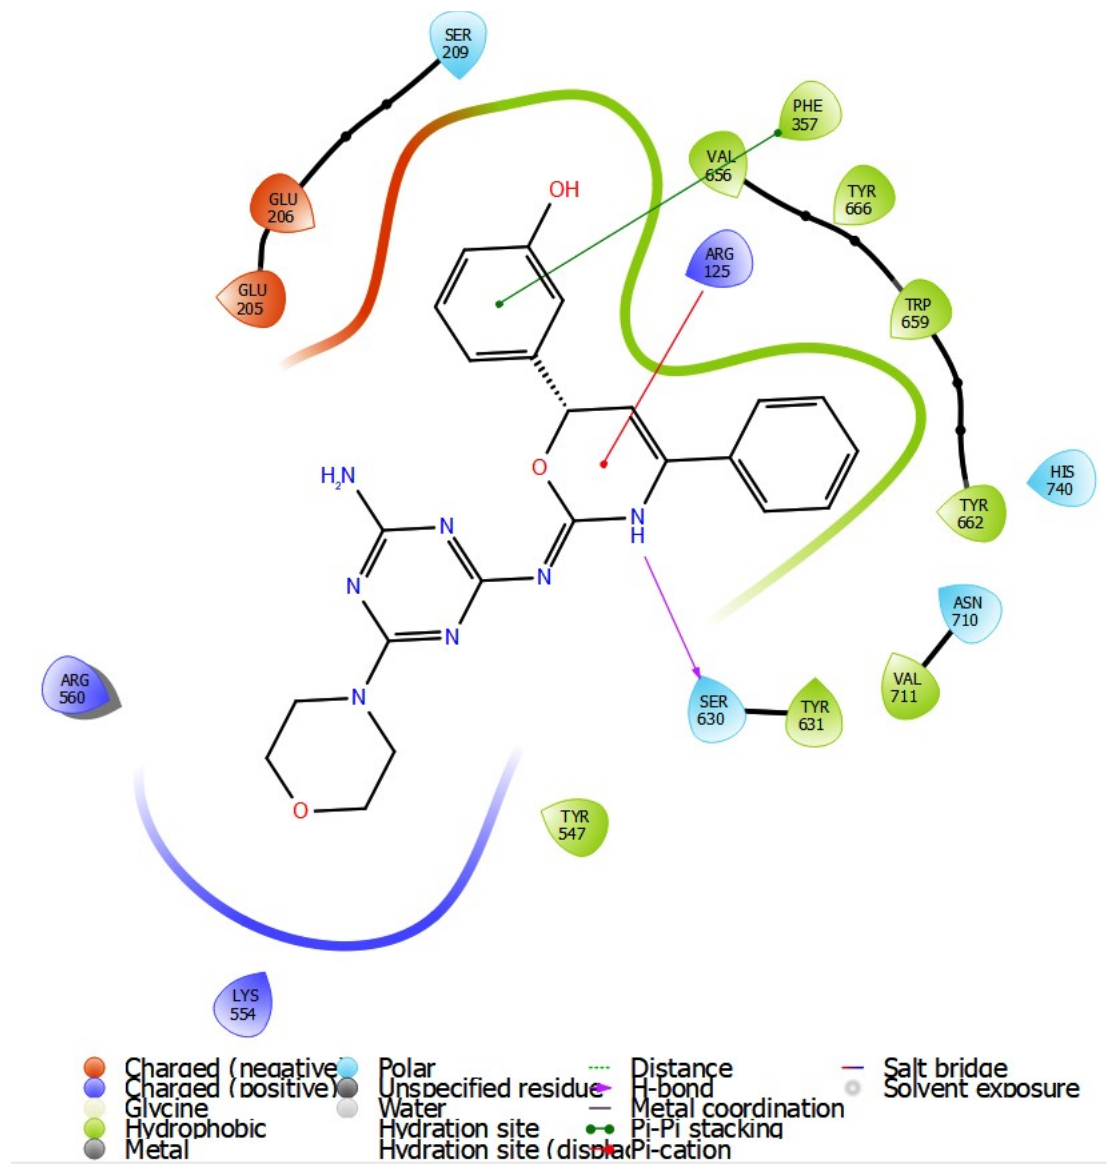

Figure SI 5: Drug-interaction diagram of compound 8(f)

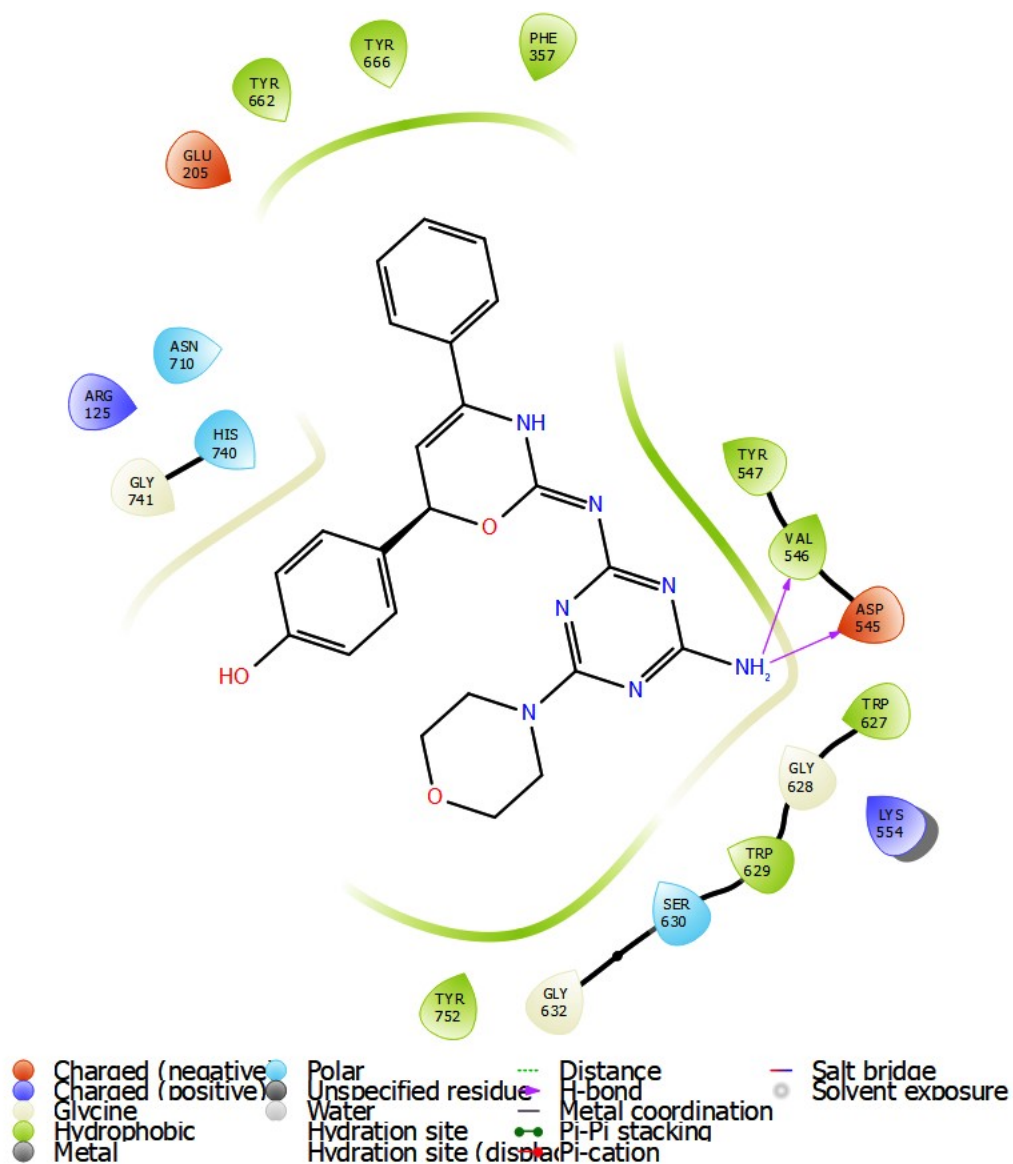

Figure SI 6: Drug-interaction diagram of compound 8(g)

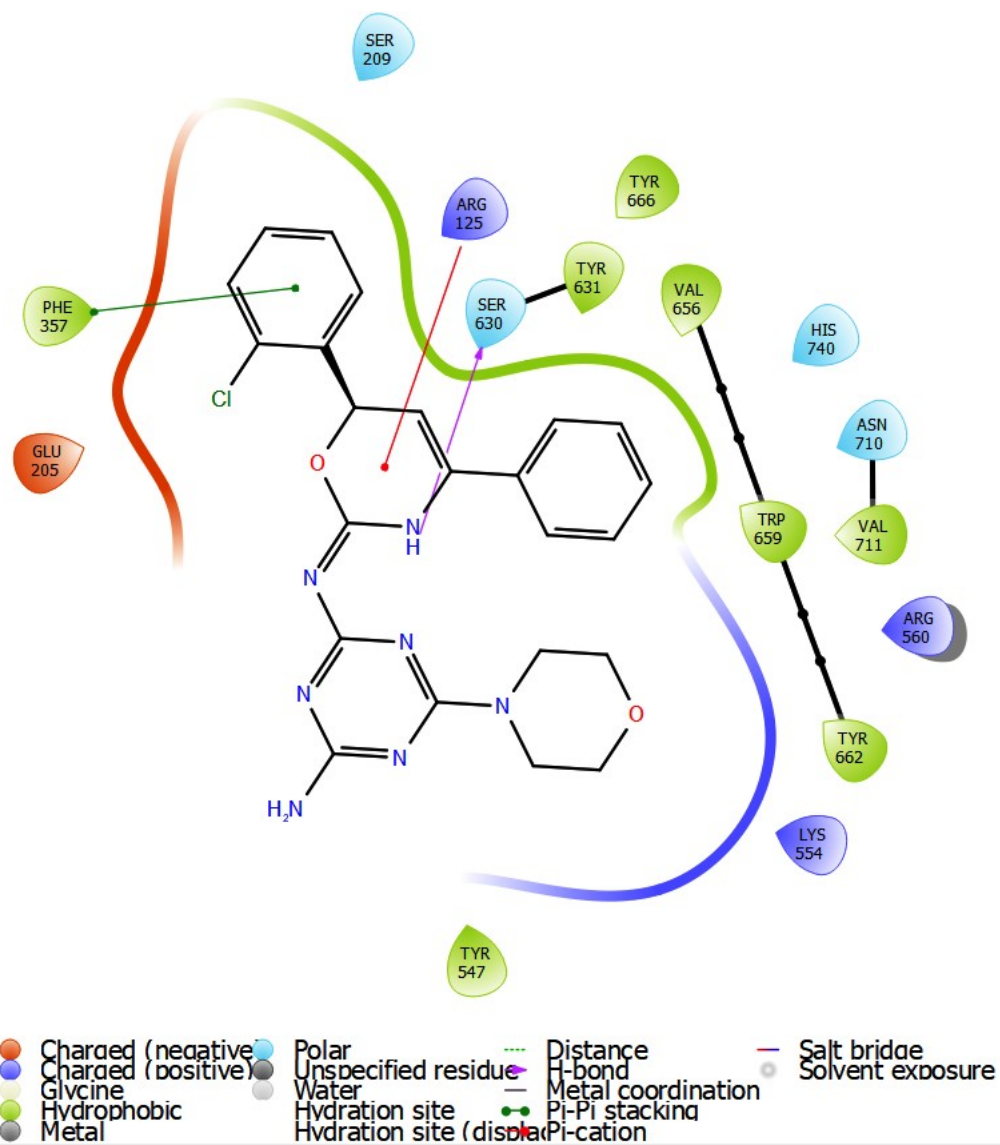

**Figure SI 7:** Drug-interaction diagram of compound 8(h)

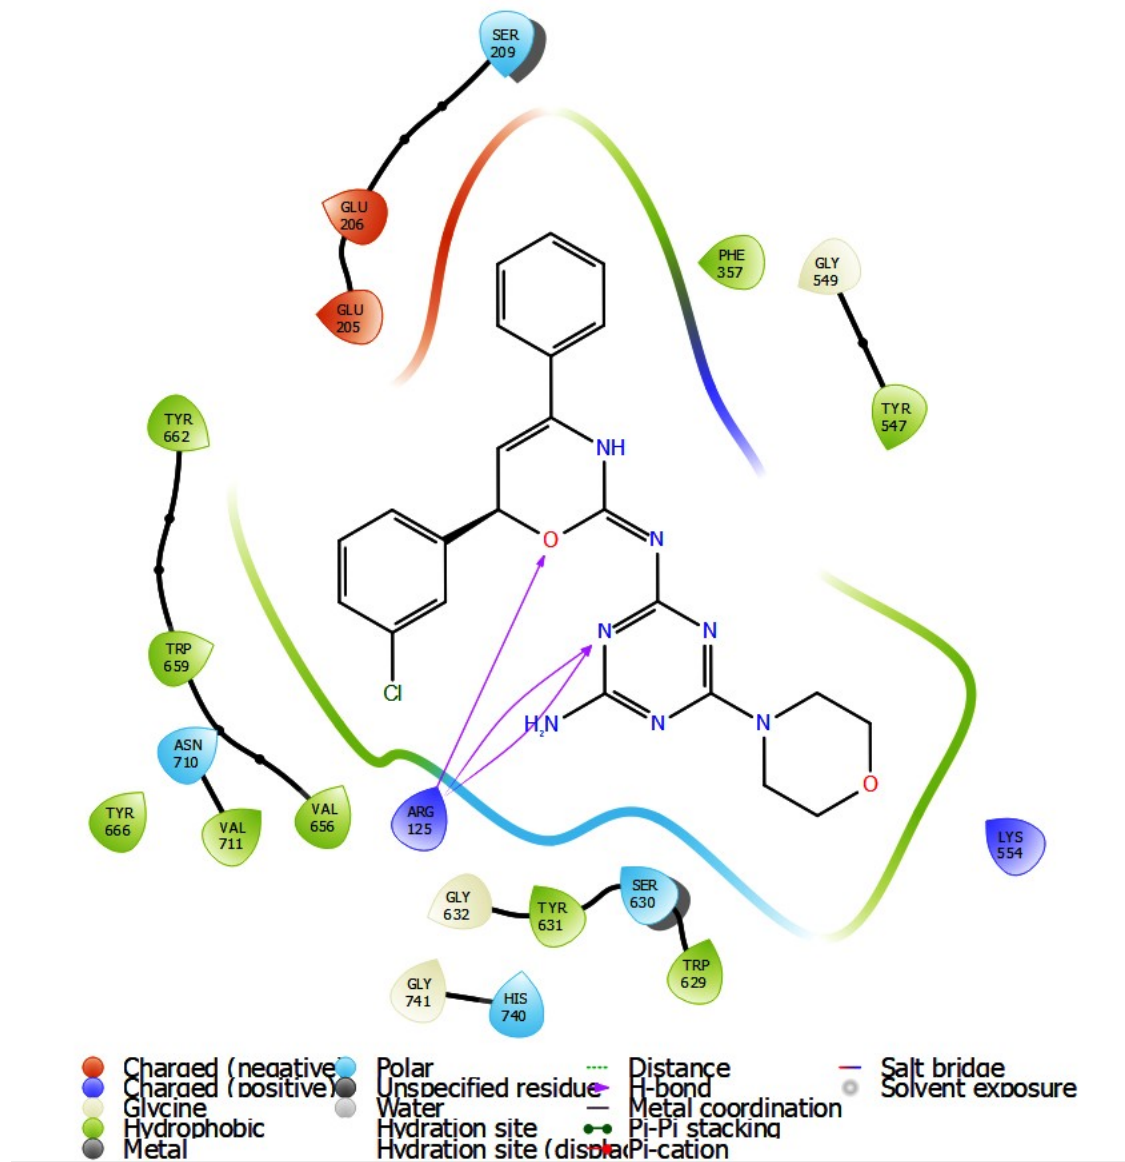

Figure SI 8: Drug-interaction diagram of compound 8(i)

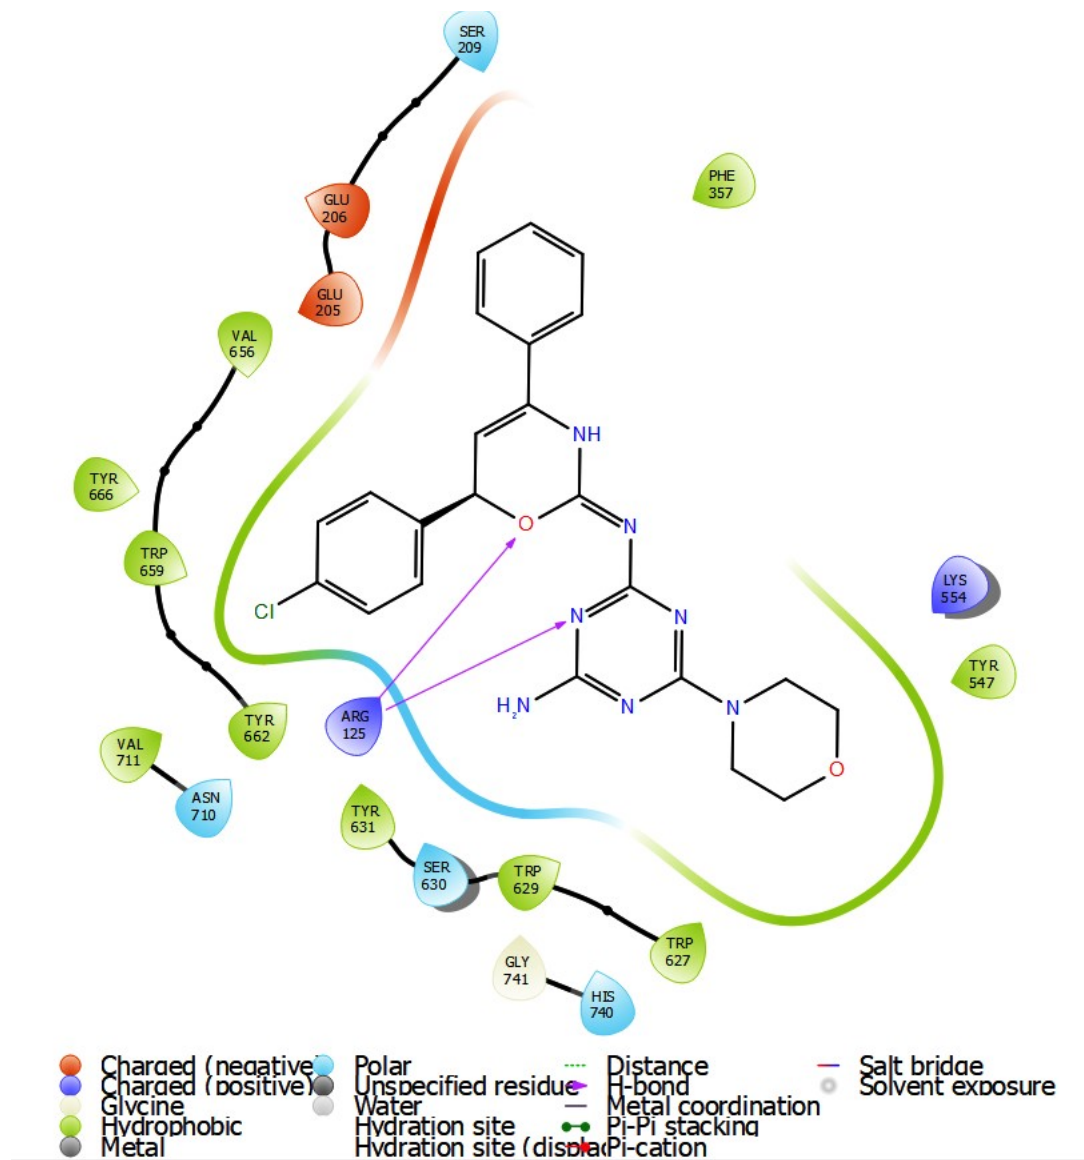

Figure SI 9: Drug-interaction diagram of compound 8(j)

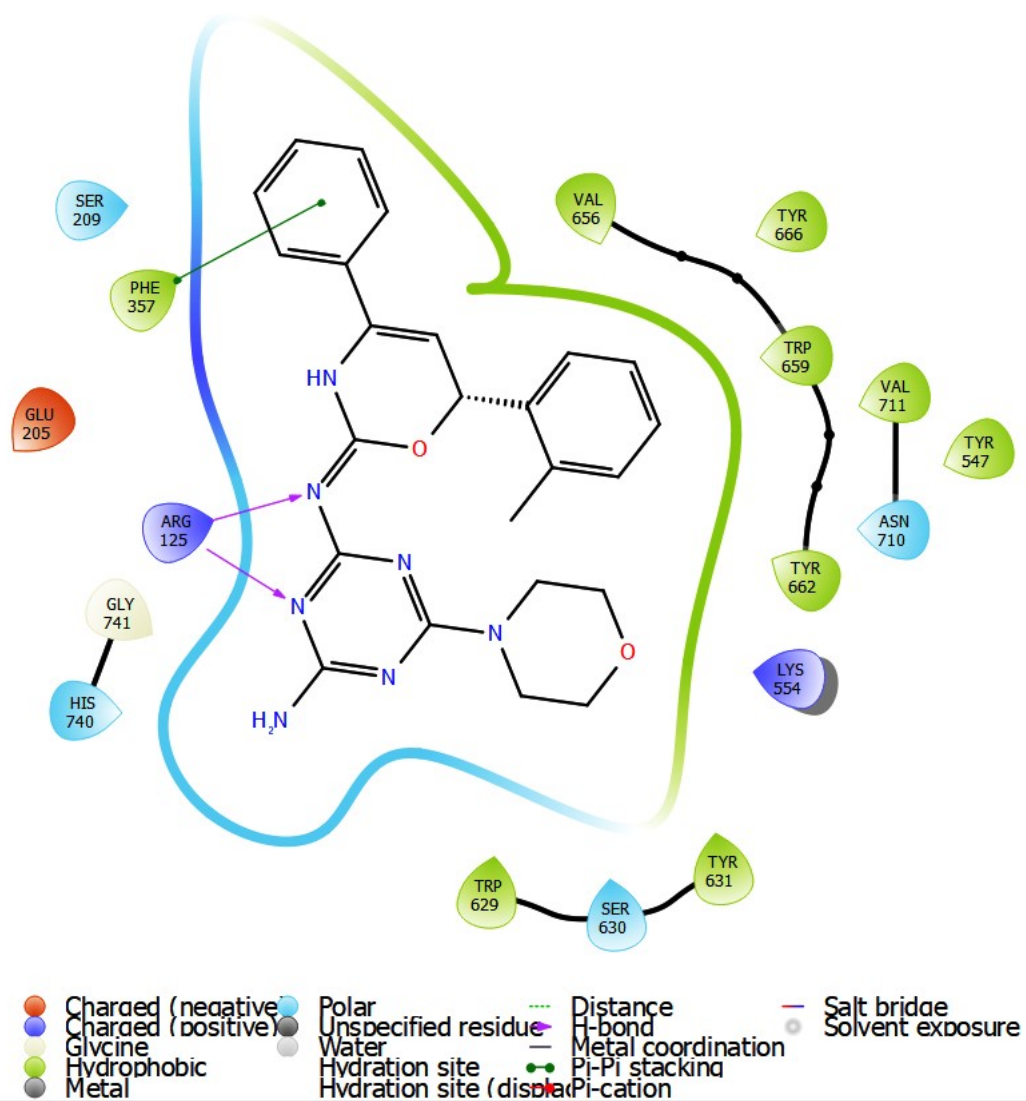

Figure SI 10: Drug-interaction diagram of compound 8(k)

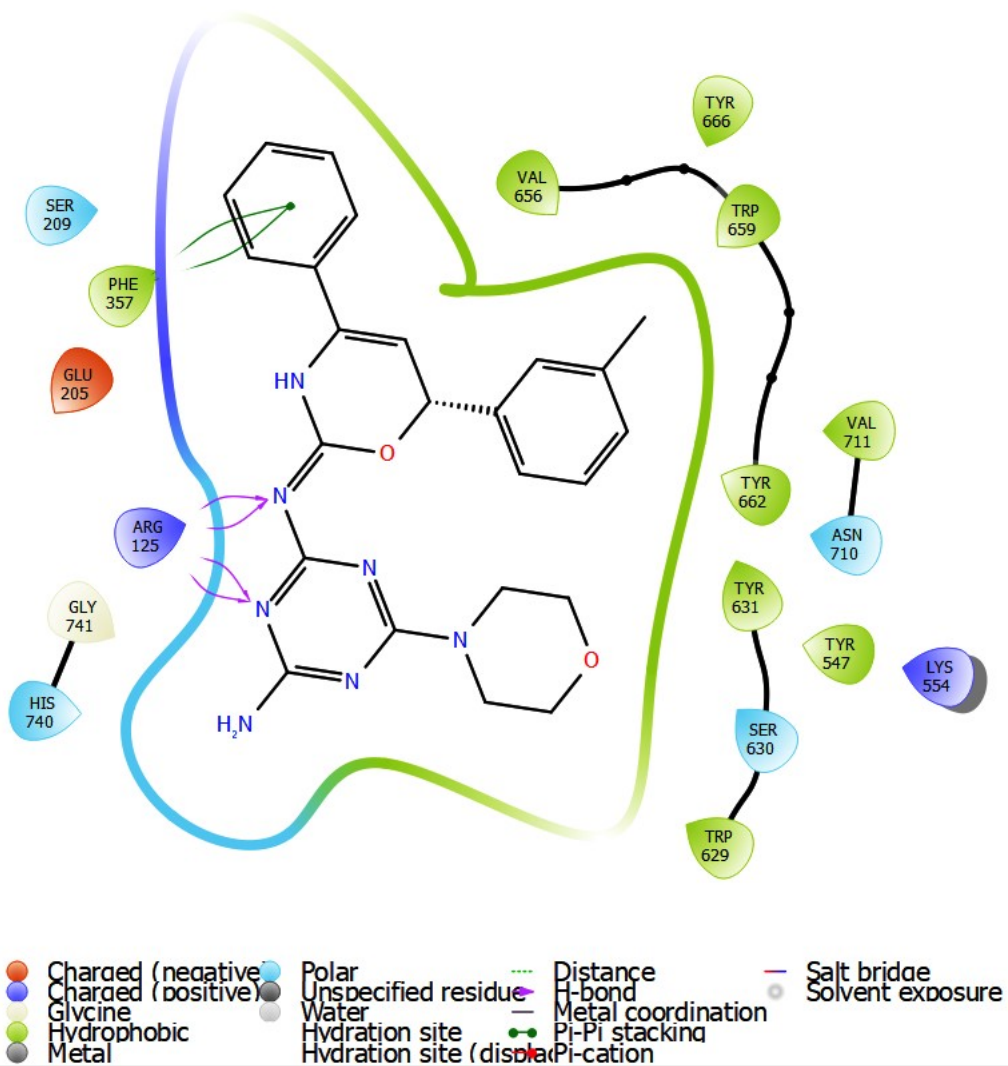

Figure SI 11: Drug-interaction diagram of compound 8(l)



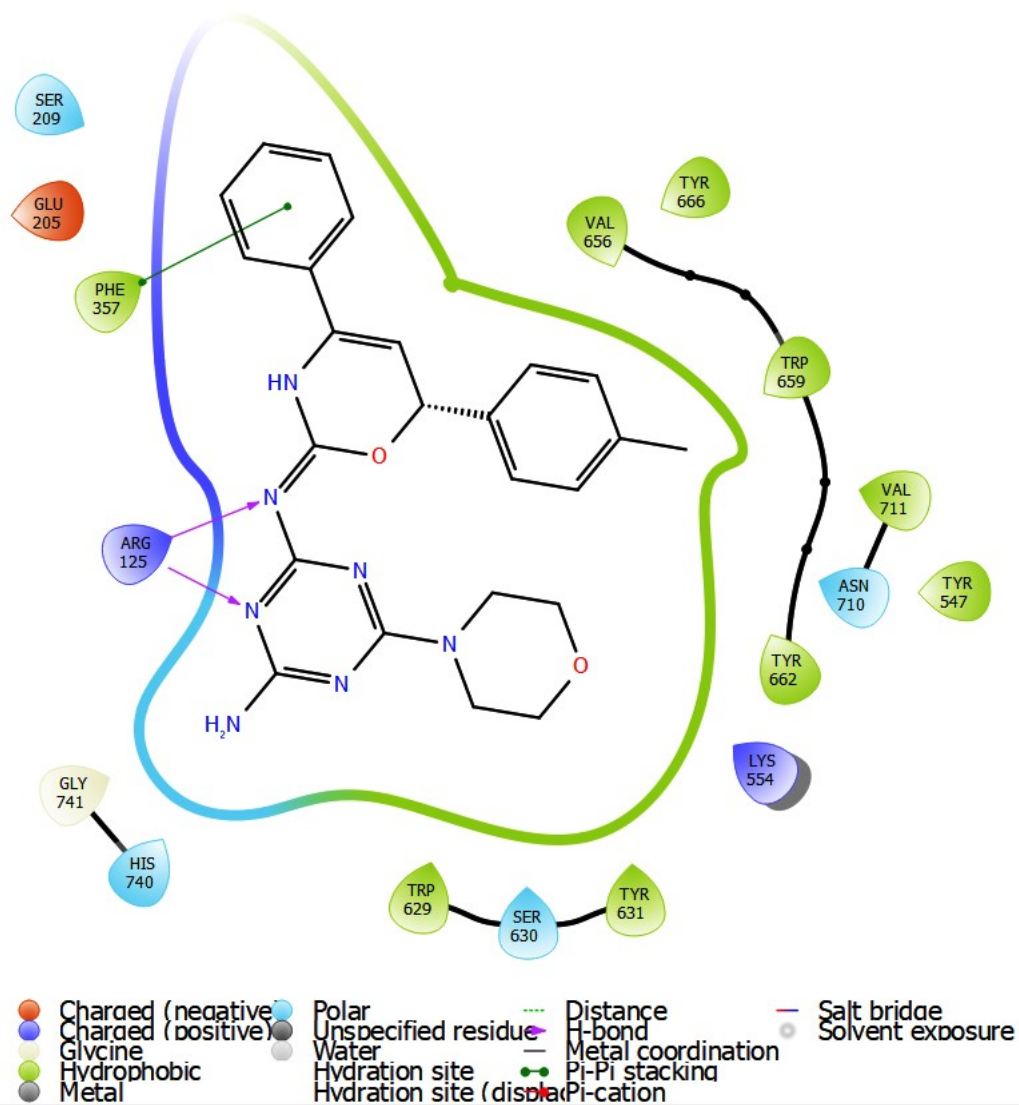

**Figure SI 12:** Drug-interaction diagram of compound 8(m)

# SPECTROSCOPICAL DATA

## Compound 8 (a)

Analyst  
Date

SAIF, CSIR-CDRI, LKO  
Monday, December 06, 2021 10:86 AM

PerkinElmer Spectrum Version 10.03.06  
Monday, December 06, 2021 10:86 AM

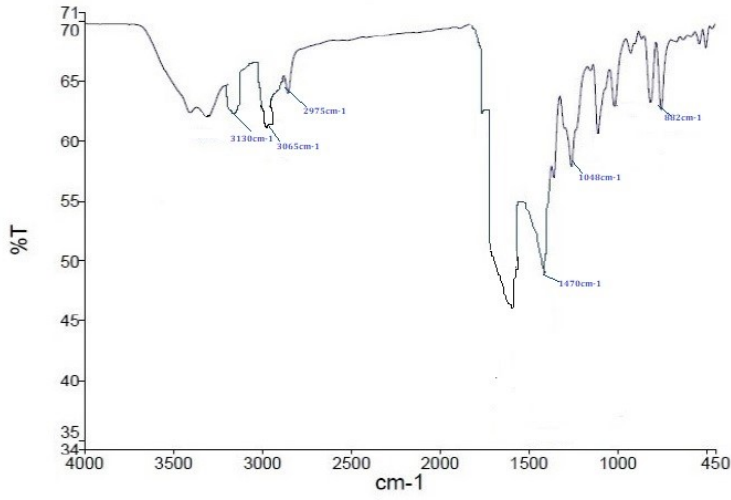

dharmesh 256.- Sample  
IR20E09DEC02  
2010476 A011 By  
dharmesh Date  
Monday  
December 06 2021



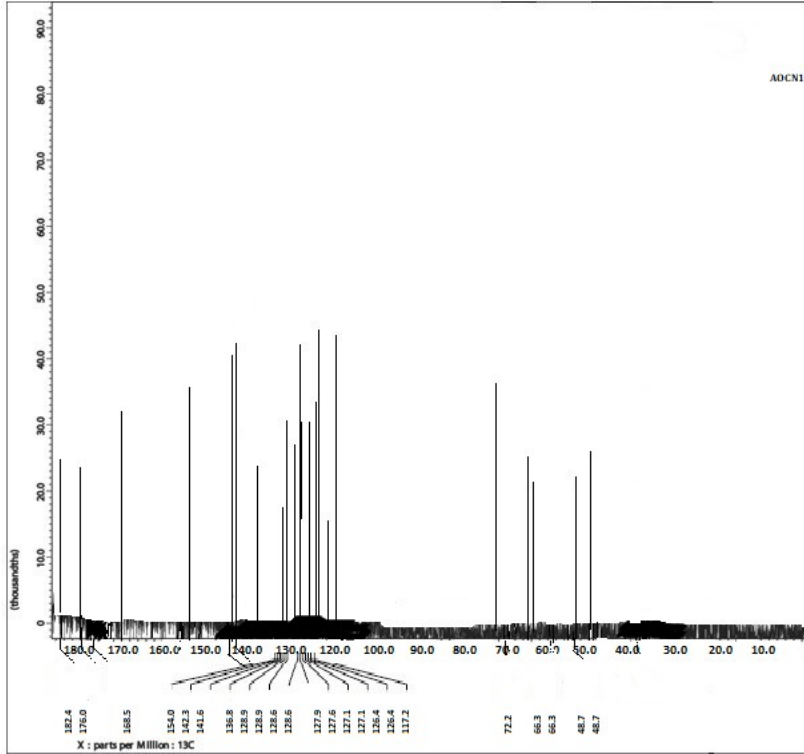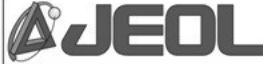

AOCN1

```

File name      = AOCN CARBON4.jdt
Author        = M.Ahmad
Experiment    = single_pulse_de
Sample id     = 2010476
Solvent       = DMSOD6
Creation time  = 12:10:22 130321
Revision time = 12:20:18 130321
Current time  = 12:25:30 130321
Data format   = 1D_COMPLEX
Dim_etb      = 26314
Dim_tide     = 13C
Dim_unit     = [ppm]
Dimension    = 1
Site         = DCX 500
Spectrometer  = DIGITAL XXL

Field_strength = 11.7473579 [t] [5000XX]
I_offset      = 100 [ppm]
I_points      = 32768
I_precision   = 4
I_resolution  = 1.19939034
I_energy     = 19.3081761 [XXx]
Irr_domain   = 1X
Irr_freq     = 500.155915.21 [XXx]
Irr_offset   = 5.0 [ppm]
Clipped      = FALSE
Mod_return   = -1
Scan        = 1500
Total_scans  = 1500

I_20_width   = 9.42 [mm]
I_ssq_time   = 0.83341792 [s]
I_sta       = 7.1 [dx]
I_pulse     = 3.206666667 [u.s]
Irr_sta_no  = 22.5 [dx]
Irr_noise   = VOLTE
Decoupling   = TRUE
Initial_wait = 1[s]
Noe         = TRUE
Noe_time    = 2[s]
Recvr_gain  = 60
Relaxation_delay = 2[s]
Repetition_time = 2.63361792 [s]
Temp_get    = 20.6 [dC]
  
```



|               |                   |             |             |                 |              |                        |                        |
|---------------|-------------------|-------------|-------------|-----------------|--------------|------------------------|------------------------|
| Sample Name   | Alarika (2010476) | Position    | Vial 1      | Instrument Name | Instrument 1 | User Name              |                        |
| Inj Vol       | 3                 | InjPosition |             | SampleType      | Sample       | IRH Calibration Status | Success                |
| Data Filename | AOM2              | ACQ Method  | ISOCRATIC.m | Comment         |              | Acquired Time          | 10/12/2021 11:17:37 AM |

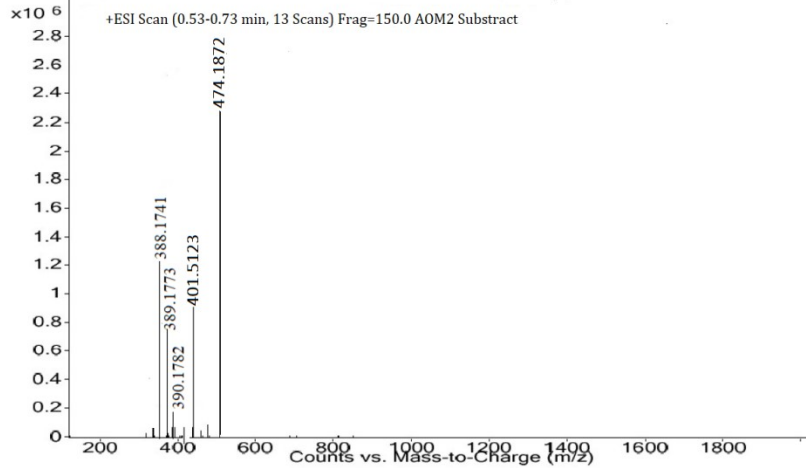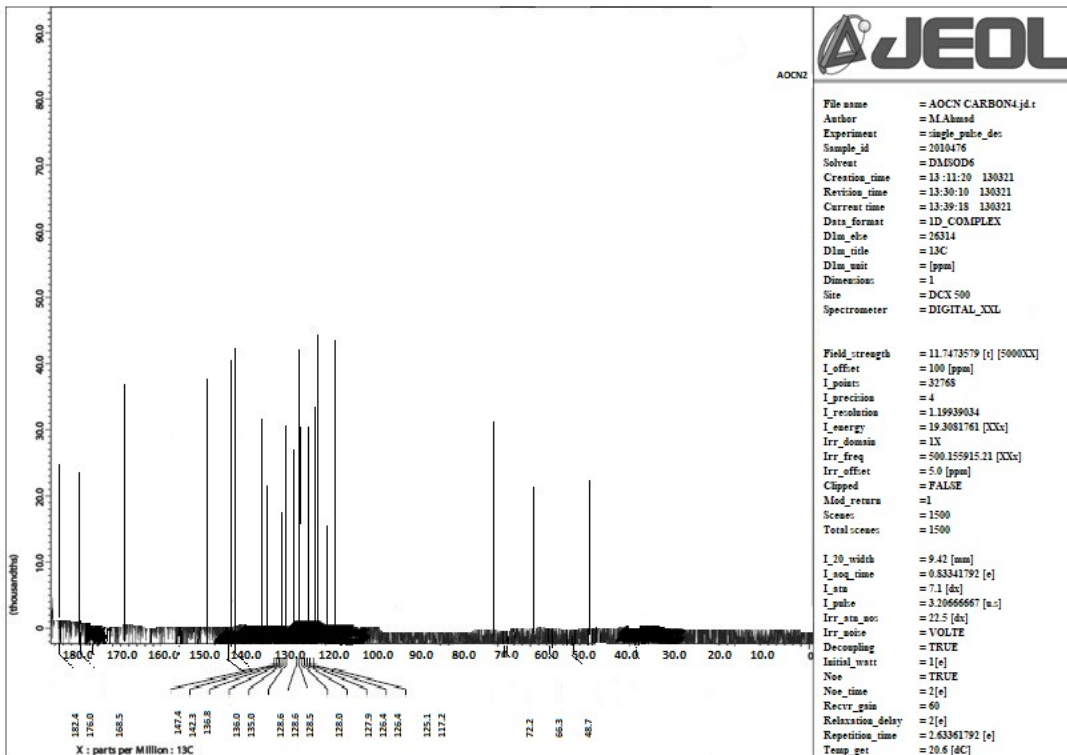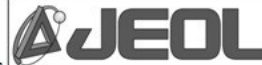

AOCN2

File name = AOCN CARBON4.jd.t  
 Author = M.Akmal  
 Experiment = single\_pulse\_de  
 Sample\_id = 2010476  
 Solvent = DMSOD6  
 Creation\_time = 13:11:20 130321  
 Revision\_time = 13:30:10 130321  
 Current\_time = 13:39:18 130321  
 Data\_format = 1D\_COMPLEX  
 Dia\_file = 26314  
 Dia\_title = 13C  
 Dia\_unit = [ppm]  
 Dimension = 1  
 Site = DCX 500  
 Spectrometer = DIGITAL XXL

Field\_strength = 11.7473579 [t] [5000XX]  
 F\_offset = 100 [ppm]  
 F\_point = 32768  
 F\_precision = 4  
 F\_resolution = 1.19939034  
 F\_energy = 19.3081761 [XX]  
 Irr\_domain = 1X  
 Irr\_freq = 500.15591521 [XX]  
 Irr\_offset = 5.0 [ppm]  
 Clipped = FALSE  
 Mod\_return = 1  
 Scenes = 1500  
 Total\_scenes = 1500  
 F\_20\_width = 9.42 [mm]  
 F\_sog\_time = 0.83341792 [e]  
 F\_ssa = 7.1 [dt]  
 F\_pulse = 3.20666667 [u-]  
 Irr\_sta\_pos = 22.5 [dt]  
 Irr\_solo = VOLTAGE  
 Decoupling = TRUE  
 Initial\_watt = 1[e]  
 Noe = TRUE  
 Noe\_time = 2[e]  
 Recvr\_gain = 60  
 Relaxation\_delay = 2[e]  
 Repetition\_time = 2.63361792 [e]  
 Temp\_get = 20.6 [dC]

# Compound 8 (c)

Analyst  
Date

SAIF, CSIR-CDRI, LKO  
Monday, December 06, 2021 10:98 AM

PerkinElmer Spectrum Version 10.03.06  
Monday, December 06, 2021 10:98 AM

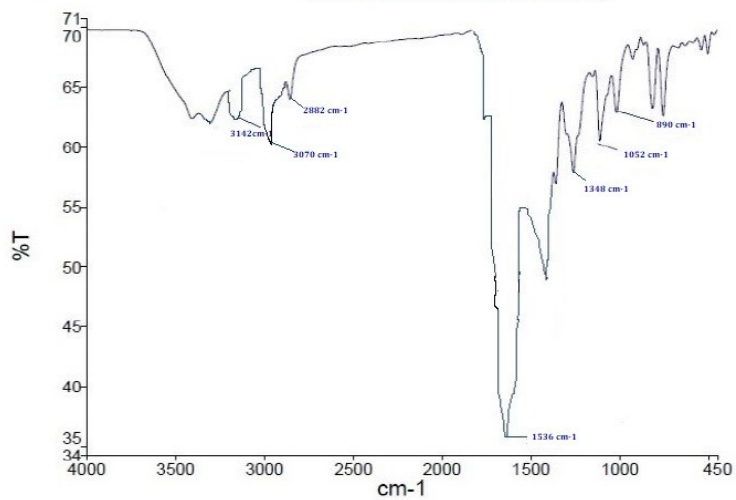

dharmesh 256 - Sample  
IR20E09DEC02  
2010476 A013 By  
dharmesh Date  
Monday  
December 06 2021

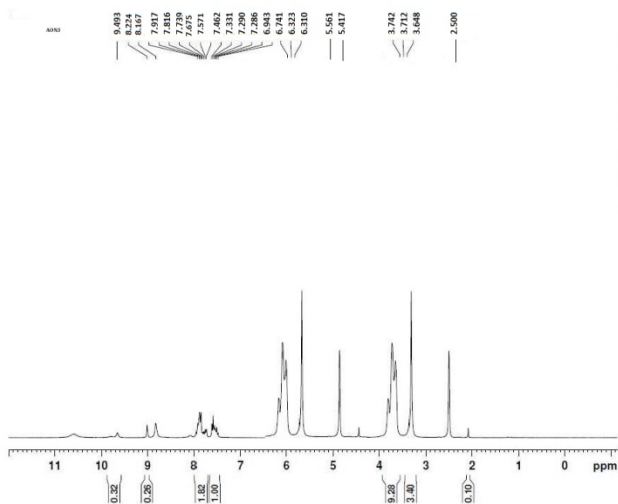

```

NAME 1274.A.MU
EXPNO 1
PROCNO 1
PROCAM 1
SOLVENT
INSTRUM spect
PROBHD 5 mm QNP 1H/1
PULPROG zgpg30
TD 65536
AQ 0.02000000
RG 32
DS 2
F2 -
F3 -
F4 -
F5 -
F6 -
F7 -
F8 -
F9 -
F10 -
F11 -
F12 -
F13 -
F14 -
F15 -
F16 -
F17 -
F18 -
F19 -
F20 -
F21 -
F22 -
F23 -
F24 -
F25 -
F26 -
F27 -
F28 -
F29 -
F30 -
F31 -
F32 -
F33 -
F34 -
F35 -
F36 -
F37 -
F38 -
F39 -
F40 -
F41 -
F42 -
F43 -
F44 -
F45 -
F46 -
F47 -
F48 -
F49 -
F50 -
F51 -
F52 -
F53 -
F54 -
F55 -
F56 -
F57 -
F58 -
F59 -
F60 -
F61 -
F62 -
F63 -
F64 -
F65 -
F66 -
F67 -
F68 -
F69 -
F70 -
F71 -
F72 -
F73 -
F74 -
F75 -
F76 -
F77 -
F78 -
F79 -
F80 -
F81 -
F82 -
F83 -
F84 -
F85 -
F86 -
F87 -
F88 -
F89 -
F90 -
F91 -
F92 -
F93 -
F94 -
F95 -
F96 -
F97 -
F98 -
F99 -
F100 -
F101 -
F102 -
F103 -
F104 -
F105 -
F106 -
F107 -
F108 -
F109 -
F110 -
F111 -
F112 -
F113 -
F114 -
F115 -
F116 -
F117 -
F118 -
F119 -
F120 -
F121 -
F122 -
F123 -
F124 -
F125 -
F126 -
F127 -
F128 -
F129 -
F130 -
F131 -
F132 -
F133 -
F134 -
F135 -
F136 -
F137 -
F138 -
F139 -
F140 -
F141 -
F142 -
F143 -
F144 -
F145 -
F146 -
F147 -
F148 -
F149 -
F150 -
F151 -
F152 -
F153 -
F154 -
F155 -
F156 -
F157 -
F158 -
F159 -
F160 -
F161 -
F162 -
F163 -
F164 -
F165 -
F166 -
F167 -
F168 -
F169 -
F170 -
F171 -
F172 -
F173 -
F174 -
F175 -
F176 -
F177 -
F178 -
F179 -
F180 -
F181 -
F182 -
F183 -
F184 -
F185 -
F186 -
F187 -
F188 -
F189 -
F190 -
F191 -
F192 -
F193 -
F194 -
F195 -
F196 -
F197 -
F198 -
F199 -
F200 -
F201 -
F202 -
F203 -
F204 -
F205 -
F206 -
F207 -
F208 -
F209 -
F210 -
F211 -
F212 -
F213 -
F214 -
F215 -
F216 -
F217 -
F218 -
F219 -
F220 -
F221 -
F222 -
F223 -
F224 -
F225 -
F226 -
F227 -
F228 -
F229 -
F230 -
F231 -
F232 -
F233 -
F234 -
F235 -
F236 -
F237 -
F238 -
F239 -
F240 -
F241 -
F242 -
F243 -
F244 -
F245 -
F246 -
F247 -
F248 -
F249 -
F250 -
F251 -
F252 -
F253 -
F254 -
F255 -
F256 -
F257 -
F258 -
F259 -
F260 -
F261 -
F262 -
F263 -
F264 -
F265 -
F266 -
F267 -
F268 -
F269 -
F270 -
F271 -
F272 -
F273 -
F274 -
F275 -
F276 -
F277 -
F278 -
F279 -
F280 -
F281 -
F282 -
F283 -
F284 -
F285 -
F286 -
F287 -
F288 -
F289 -
F290 -
F291 -
F292 -
F293 -
F294 -
F295 -
F296 -
F297 -
F298 -
F299 -
F300 -
F301 -
F302 -
F303 -
F304 -
F305 -
F306 -
F307 -
F308 -
F309 -
F310 -
F311 -
F312 -
F313 -
F314 -
F315 -
F316 -
F317 -
F318 -
F319 -
F320 -
F321 -
F322 -
F323 -
F324 -
F325 -
F326 -
F327 -
F328 -
F329 -
F330 -
F331 -
F332 -
F333 -
F334 -
F335 -
F336 -
F337 -
F338 -
F339 -
F340 -
F341 -
F342 -
F343 -
F344 -
F345 -
F346 -
F347 -
F348 -
F349 -
F350 -
F351 -
F352 -
F353 -
F354 -
F355 -
F356 -
F357 -
F358 -
F359 -
F360 -
F361 -
F362 -
F363 -
F364 -
F365 -
F366 -
F367 -
F368 -
F369 -
F370 -
F371 -
F372 -
F373 -
F374 -
F375 -
F376 -
F377 -
F378 -
F379 -
F380 -
F381 -
F382 -
F383 -
F384 -
F385 -
F386 -
F387 -
F388 -
F389 -
F390 -
F391 -
F392 -
F393 -
F394 -
F395 -
F396 -
F397 -
F398 -
F399 -
F400 -
F401 -
F402 -
F403 -
F404 -
F405 -
F406 -
F407 -
F408 -
F409 -
F410 -
F411 -
F412 -
F413 -
F414 -
F415 -
F416 -
F417 -
F418 -
F419 -
F420 -
F421 -
F422 -
F423 -
F424 -
F425 -
F426 -
F427 -
F428 -
F429 -
F430 -
F431 -
F432 -
F433 -
F434 -
F435 -
F436 -
F437 -
F438 -
F439 -
F440 -
F441 -
F442 -
F443 -
F444 -
F445 -
F446 -
F447 -
F448 -
F449 -
F450 -
F451 -
F452 -
F453 -
F454 -
F455 -
F456 -
F457 -
F458 -
F459 -
F460 -
F461 -
F462 -
F463 -
F464 -
F465 -
F466 -
F467 -
F468 -
F469 -
F470 -
F471 -
F472 -
F473 -
F474 -
F475 -
F476 -
F477 -
F478 -
F479 -
F480 -
F481 -
F482 -
F483 -
F484 -
F485 -
F486 -
F487 -
F488 -
F489 -
F490 -
F491 -
F492 -
F493 -
F494 -
F495 -
F496 -
F497 -
F498 -
F499 -
F500 -
F501 -
F502 -
F503 -
F504 -
F505 -
F506 -
F507 -
F508 -
F509 -
F510 -
F511 -
F512 -
F513 -
F514 -
F515 -
F516 -
F517 -
F518 -
F519 -
F520 -
F521 -
F522 -
F523 -
F524 -
F525 -
F526 -
F527 -
F528 -
F529 -
F530 -
F531 -
F532 -
F533 -
F534 -
F535 -
F536 -
F537 -
F538 -
F539 -
F540 -
F541 -
F542 -
F543 -
F544 -
F545 -
F546 -
F547 -
F548 -
F549 -
F550 -
F551 -
F552 -
F553 -
F554 -
F555 -
F556 -
F557 -
F558 -
F559 -
F560 -
F561 -
F562 -
F563 -
F564 -
F565 -
F566 -
F567 -
F568 -
F569 -
F570 -
F571 -
F572 -
F573 -
F574 -
F575 -
F576 -
F577 -
F578 -
F579 -
F580 -
F581 -
F582 -
F583 -
F584 -
F585 -
F586 -
F587 -
F588 -
F589 -
F590 -
F591 -
F592 -
F593 -
F594 -
F595 -
F596 -
F597 -
F598 -
F599 -
F600 -
F601 -
F602 -
F603 -
F604 -
F605 -
F606 -
F607 -
F608 -
F609 -
F610 -
F611 -
F612 -
F613 -
F614 -
F615 -
F616 -
F617 -
F618 -
F619 -
F620 -
F621 -
F622 -
F623 -
F624 -
F625 -
F626 -
F627 -
F628 -
F629 -
F630 -
F631 -
F632 -
F633 -
F634 -
F635 -
F636 -
F637 -
F638 -
F639 -
F640 -
F641 -
F642 -
F643 -
F644 -
F645 -
F646 -
F647 -
F648 -
F649 -
F650 -
F651 -
F652 -
F653 -
F654 -
F655 -
F656 -
F657 -
F658 -
F659 -
F660 -
F661 -
F662 -
F663 -
F664 -
F665 -
F666 -
F667 -
F668 -
F669 -
F670 -
F671 -
F672 -
F673 -
F674 -
F675 -
F676 -
F677 -
F678 -
F679 -
F680 -
F681 -
F682 -
F683 -
F684 -
F685 -
F686 -
F687 -
F688 -
F689 -
F690 -
F691 -
F692 -
F693 -
F694 -
F695 -
F696 -
F697 -
F698 -
F699 -
F700 -
F701 -
F702 -
F703 -
F704 -
F705 -
F706 -
F707 -
F708 -
F709 -
F710 -
F711 -
F712 -
F713 -
F714 -
F715 -
F716 -
F717 -
F718 -
F719 -
F720 -
F721 -
F722 -
F723 -
F724 -
F725 -
F726 -
F727 -
F728 -
F729 -
F730 -
F731 -
F732 -
F733 -
F734 -
F735 -
F736 -
F737 -
F738 -
F739 -
F740 -
F741 -
F742 -
F743 -
F744 -
F745 -
F746 -
F747 -
F748 -
F749 -
F750 -
F751 -
F752 -
F753 -
F754 -
F755 -
F756 -
F757 -
F758 -
F759 -
F760 -
F761 -
F762 -
F763 -
F764 -
F765 -
F766 -
F767 -
F768 -
F769 -
F770 -
F771 -
F772 -
F773 -
F774 -
F775 -
F776 -
F777 -
F778 -
F779 -
F780 -
F781 -
F782 -
F783 -
F784 -
F785 -
F786 -
F787 -
F788 -
F789 -
F790 -
F791 -
F792 -
F793 -
F794 -
F795 -
F796 -
F797 -
F798 -
F799 -
F800 -
F801 -
F802 -
F803 -
F804 -
F805 -
F806 -
F807 -
F808 -
F809 -
F810 -
F811 -
F812 -
F813 -
F814 -
F815 -
F816 -
F817 -
F818 -
F819 -
F820 -
F821 -
F822 -
F823 -
F824 -
F825 -
F826 -
F827 -
F828 -
F829 -
F830 -
F831 -
F832 -
F833 -
F834 -
F835 -
F836 -
F837 -
F838 -
F839 -
F840 -
F841 -
F842 -
F843 -
F844 -
F845 -
F846 -
F847 -
F848 -
F849 -
F850 -
F851 -
F852 -
F853 -
F854 -
F855 -
F856 -
F857 -
F858 -
F859 -
F860 -
F861 -
F862 -
F863 -
F864 -
F865 -
F866 -
F867 -
F868 -
F869 -
F870 -
F871 -
F872 -
F873 -
F874 -
F875 -
F876 -
F877 -
F878 -
F879 -
F880 -
F881 -
F882 -
F883 -
F884 -
F885 -
F886 -
F887 -
F888 -
F889 -
F890 -
F891 -
F892 -
F893 -
F894 -
F895 -
F896 -
F897 -
F898 -
F899 -
F900 -
F901 -
F902 -
F903 -
F904 -
F905 -
F906 -
F907 -
F908 -
F909 -
F910 -
F911 -
F912 -
F913 -
F914 -
F915 -
F916 -
F917 -
F918 -
F919 -
F920 -
F921 -
F922 -
F923 -
F924 -
F925 -
F926 -
F927 -
F928 -
F929 -
F930 -
F931 -
F932 -
F933 -
F934 -
F935 -
F936 -
F937 -
F938 -
F939 -
F940 -
F941 -
F942 -
F943 -
F944 -
F945 -
F946 -
F947 -
F948 -
F949 -
F950 -
F951 -
F952 -
F953 -
F954 -
F955 -
F956 -
F957 -
F958 -
F959 -
F960 -
F961 -
F962 -
F963 -
F964 -
F965 -
F966 -
F967 -
F968 -
F969 -
F970 -
F971 -
F972 -
F973 -
F974 -
F975 -
F976 -
F977 -
F978 -
F979 -
F980 -
F981 -
F982 -
F983 -
F984 -
F985 -
F986 -
F987 -
F988 -
F989 -
F990 -
F991 -
F992 -
F993 -
F994 -
F995 -
F996 -
F997 -
F998 -
F999 -
F1000 -

```

|               |                    |              |             |                 |              |                        |                        |
|---------------|--------------------|--------------|-------------|-----------------|--------------|------------------------|------------------------|
| Sample Name   | Alanksha (2010476) | Position     | Vial 1      | Instrument Name | Instrument 1 | User Name              |                        |
| Inj Vol       | 3                  | Inj Position |             | Sample Type     | Sample       | IRH Calibration Status | Success                |
| Data Filename | AOM3               | ACQ Method   | ISOCRATIC.m | Comment         |              | Acquired Time          | 10/12/2021 11:22:13 AM |

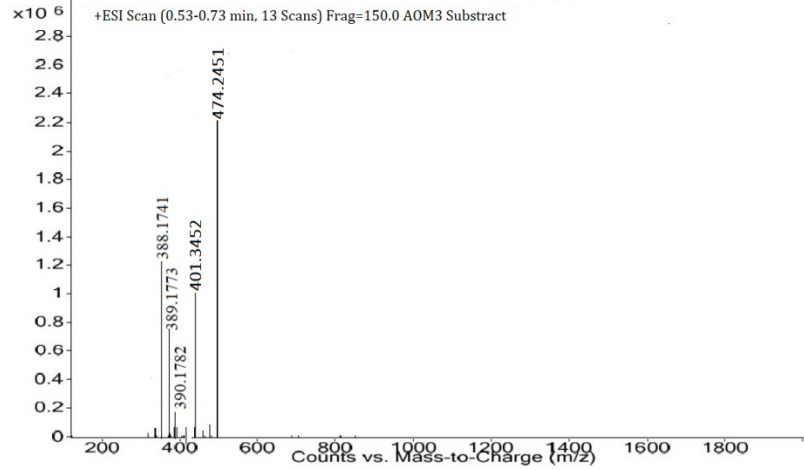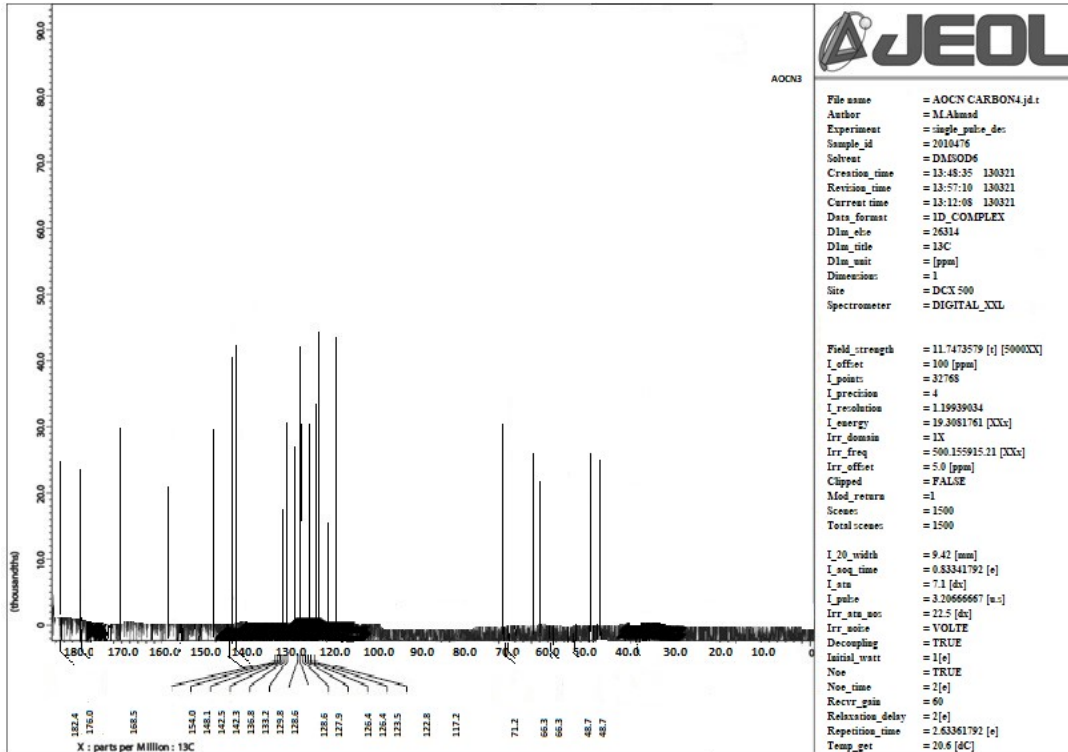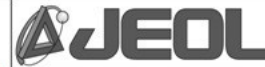

AOCN3

File name = AOCN CARBON4.jdt  
 Author = M.Ahmad  
 Experiment = single\_pulse\_de  
 Sample\_id = 2010476  
 Solvent = DMSOD6  
 Creation\_time = 13:48:35 130321  
 Revision\_time = 13:57:10 130321  
 Current\_time = 13:12:08 130321  
 Data\_format = 1D\_COMPLEX  
 Dia\_she = 36314  
 Dia\_tite = 13C  
 Dia\_unit = [ppm]  
 Dimension = 1  
 Site = DCX 500  
 Spectrometer = DIGITAL XXL

Field\_strength = 11.7473579 [t] [5000XX]  
 L\_offset = 100 [ppm]  
 L\_point = -32768  
 L\_precision = 4  
 L\_resolution = 1.19939034  
 L\_energy = 19.3081761 [XXs]  
 Irr\_domain = 1X  
 Irr\_freq = 500.15591521 [XXs]  
 Irr\_offset = 5.0 [ppm]  
 Clipped = FALSE  
 Mod\_return = 1  
 Scales = 1500  
 Total\_scales = 1500  
 L\_20\_width = 9.42 [mm]  
 L\_sog\_time = 0.83341792 [e]  
 L\_tau = -7.1 [ds]  
 L\_pulse = 3.20666667 [u-]  
 Irr\_tau\_sog = 22.5 [ds]  
 Irr\_noise = VOLTE  
 Decoupling = TRUE  
 Initial\_watr = 1[e]  
 Noe = TRUE  
 Noe\_time = 2[e]  
 Recvr\_gain = 60  
 Relaxation\_delay = 2[e]  
 Repetition\_time = 2.63361792 [e]  
 Temp\_get = 20.6 [dC]



# Compound 8 (d)

Analyst  
Date

SAIF, CSIR-CDRI, LKO  
Monday, December 06, 2021 11:15 AM

PerkinElmer Spectrum Version 10.03.06  
Monday, December 06, 2021 11:15 AM

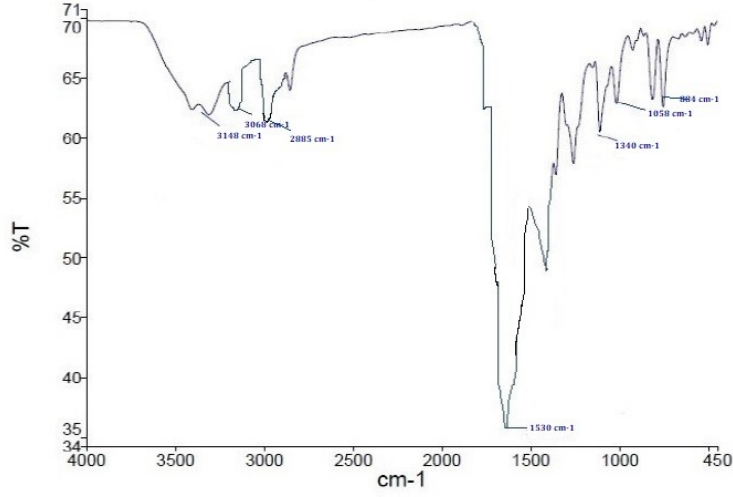

dharmesh 256 - Sample  
IR20E09DEC02  
2010476.A014 By  
dharmesh Date  
Monday  
December 06 2021

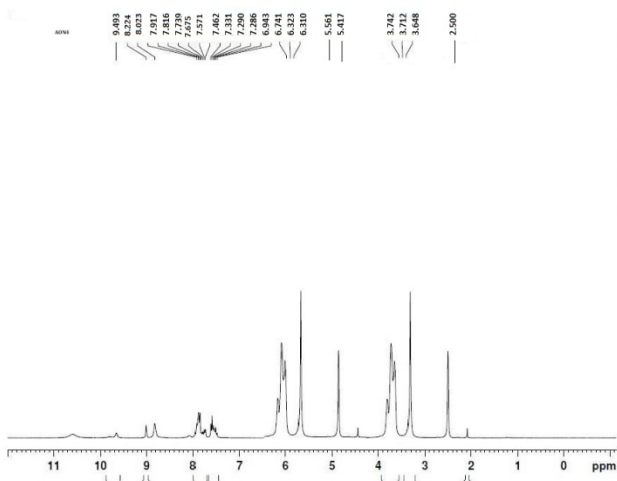

```

NAME      1274.A04
EXPNO     2
PROCNO    2
Date_     20220308
Time      15.00
INSTRUM   spect
PROBHD    5 mm QNP 1H/13
PULPROG   zgpg30
TD         65536
SOLVENT   DMSO
NS         512
DS         4
AQ         0.12631930
RG         655.3333333
AQ         0.202228700
RG         655.3333333
F2         100.6261500
F1         125.7613600
SFO       298.15
AQ         0.12631930
RG         655.3333333
F2         100.6261500
F1         125.7613600
SFO       298.15
AQ         0.12631930
RG         655.3333333
F2         100.6261500
F1         125.7613600
SFO       298.15
  
```

| Sample Name   | Akanisha (2010476) | Position    | Vial 1      | Instrument Name | Instrument 1 | User Name              |                        |
|---------------|--------------------|-------------|-------------|-----------------|--------------|------------------------|------------------------|
| Inj Vol       | 3                  | InjPosition |             | SampleType      | Sample       | IRM Calibration Status | Success                |
| Data Filename | AOM4               | ACQ Method  | ISOGRATIC.m | Comment         |              | Acquired Time          | 10/12/2021 11:27:23 AM |

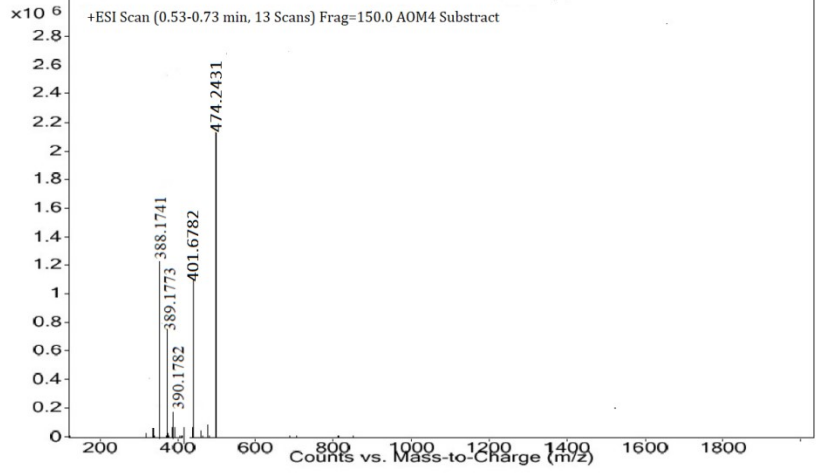

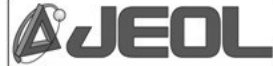

AOCN4

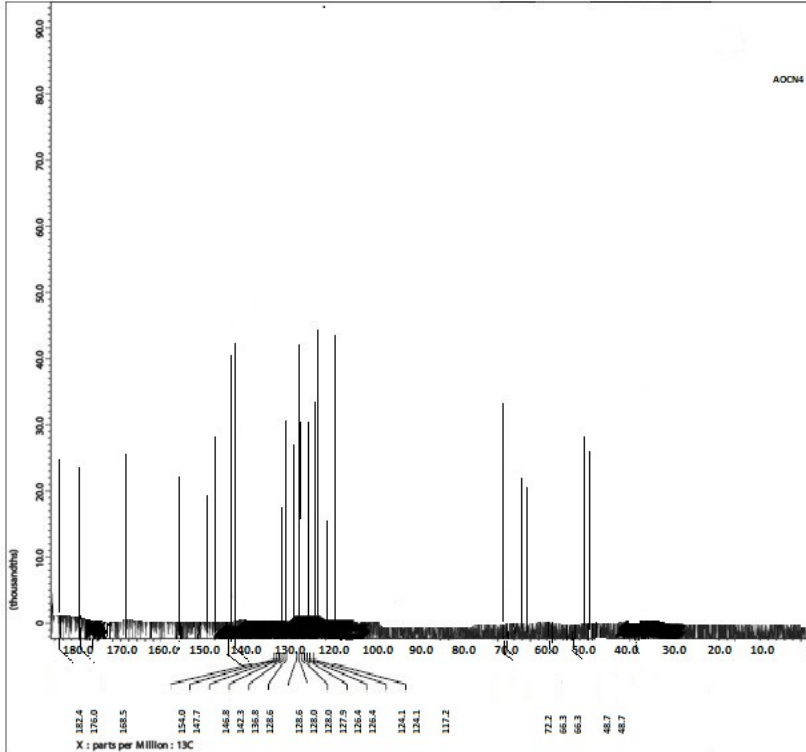

File name = AOCN CARBON4.jd.r  
Author = M.Akmal  
Experiment = single\_pulse\_de  
Sample\_id = 2010476  
Solvent = DMSOD6  
Creation\_time = 14:14:40 130321  
Revision\_time = 14:22:10 130321  
Current\_time = 14:32:30 130321  
Data\_format = ID\_COMPLEX  
Dim\_ebe = 16314  
Dim\_tide = 13C  
Dim\_unit = [ppm]  
Dimension = 1  
Site = DCX 500  
Spectrometer = DIGITAL XXL  
  
Field\_strength = 11.7473579 [t] [50000XX]  
F\_offset = 100 [ppm]  
F\_point = 32768  
F\_precision = 4  
F\_resolution = 1.19939034  
F\_energy = 19.3081761 [XXs]  
Fv\_domain = 1X  
Fv\_freq = 500.15591511 [XXs]  
Fv\_offset = 5.0 [ppm]  
Clipped = FALSE  
Mod\_return = 1  
Scans = 1500  
Total\_scans = 1500  
  
I\_20\_width = 9.42 [mm]  
I\_acq\_time = 0.83341792 [s]  
I\_sns = 7.1 [ds]  
I\_pulse = 3.20666667 [a.s]  
Iv\_sns\_pos = 22.5 [ds]  
Iv\_sns = VOLTE  
Decoupling = TRUE  
Initial\_walt = 1[s]  
Noe = TRUE  
Noe\_time = 2[s]  
Recvr\_gain = 60  
Relaxation\_delay = 2[s]  
Repetition\_time = 2.63361792 [s]  
Temp\_get = 20.6 [dC]



|               |                    |             |             |                 |              |                        |                        |
|---------------|--------------------|-------------|-------------|-----------------|--------------|------------------------|------------------------|
| Sample Name   | Alanksha (2010476) | Position    | Vial 1      | Instrument Name | Instrument 1 | User Name              |                        |
| Inj Vol       | 3                  | InjPosition |             | Sample Type     | Sample       | IRH Calibration Status | Success                |
| Data Filename | AOMS               | ACQ Method  | ISOCRATIC.m | Comment         |              | Acquired Time          | 10/12/2021 11:32:11 AM |

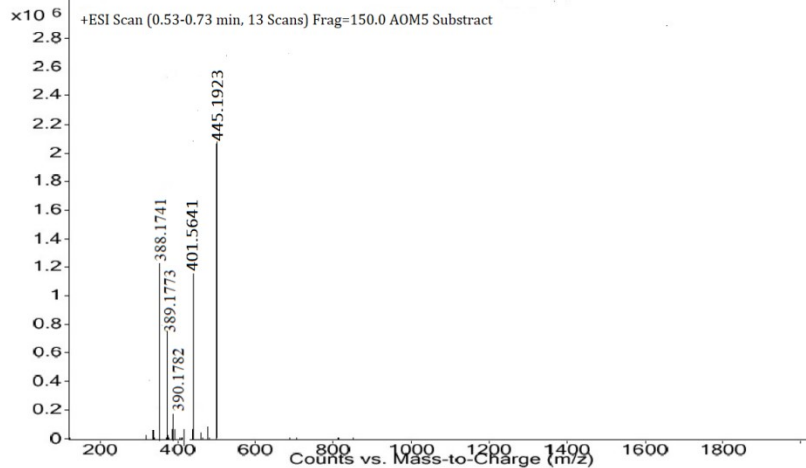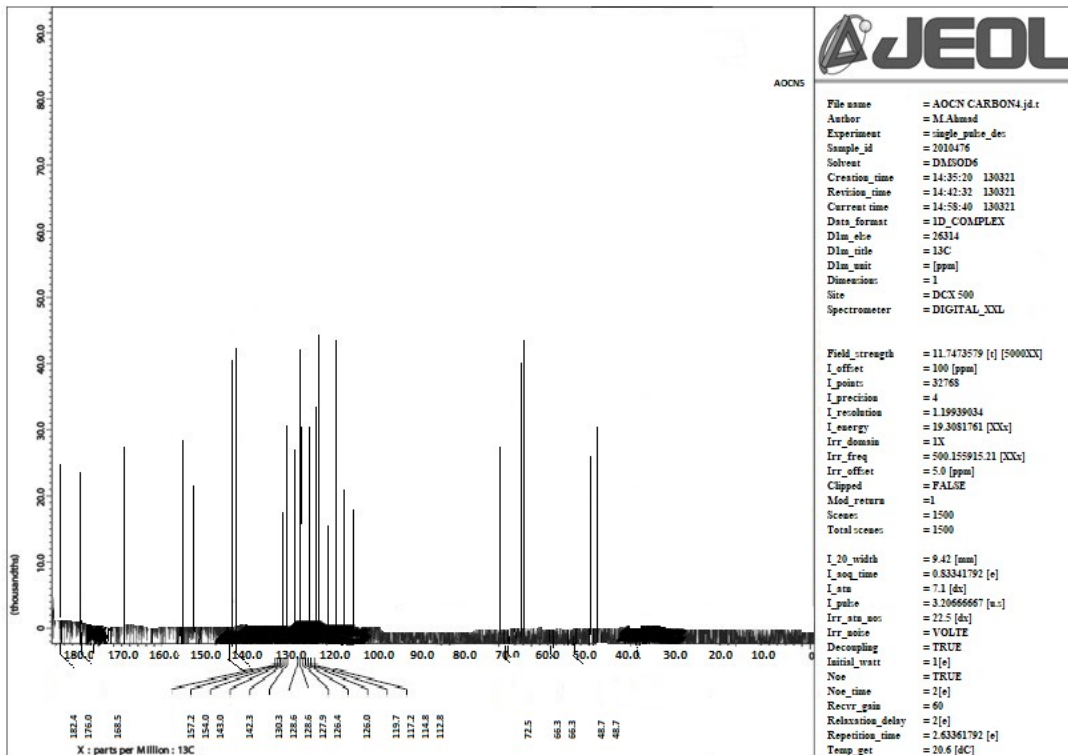



|               |                    |              |             |                 |              |                        |                        |
|---------------|--------------------|--------------|-------------|-----------------|--------------|------------------------|------------------------|
| Sample Name   | Alanksha (2010476) | Position     | Vial 1      | Instrument Name | Instrument 1 | User Name              |                        |
| Inj Vol       | 3                  | Inj Position |             | Sample Type     | Sample       | IMM Calibration Status | Success                |
| Data Filename | AOM6               | ACQ Method   | ISOCRATIC.m | Comment         |              | Acquired Time          | 10/12/2021 11:37:49 AM |

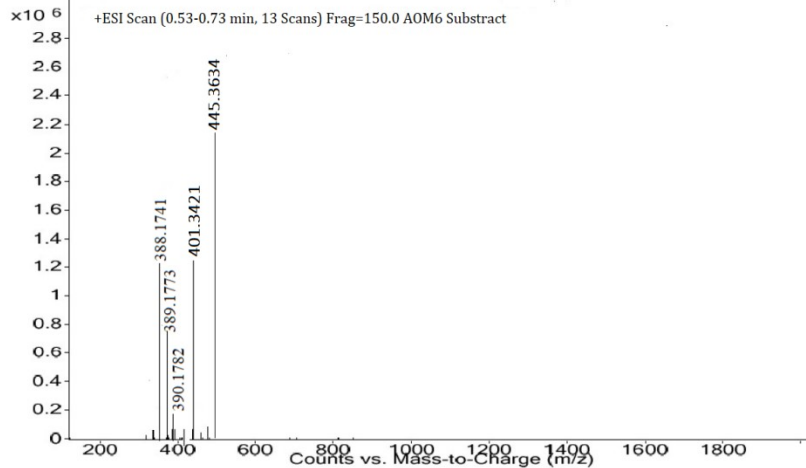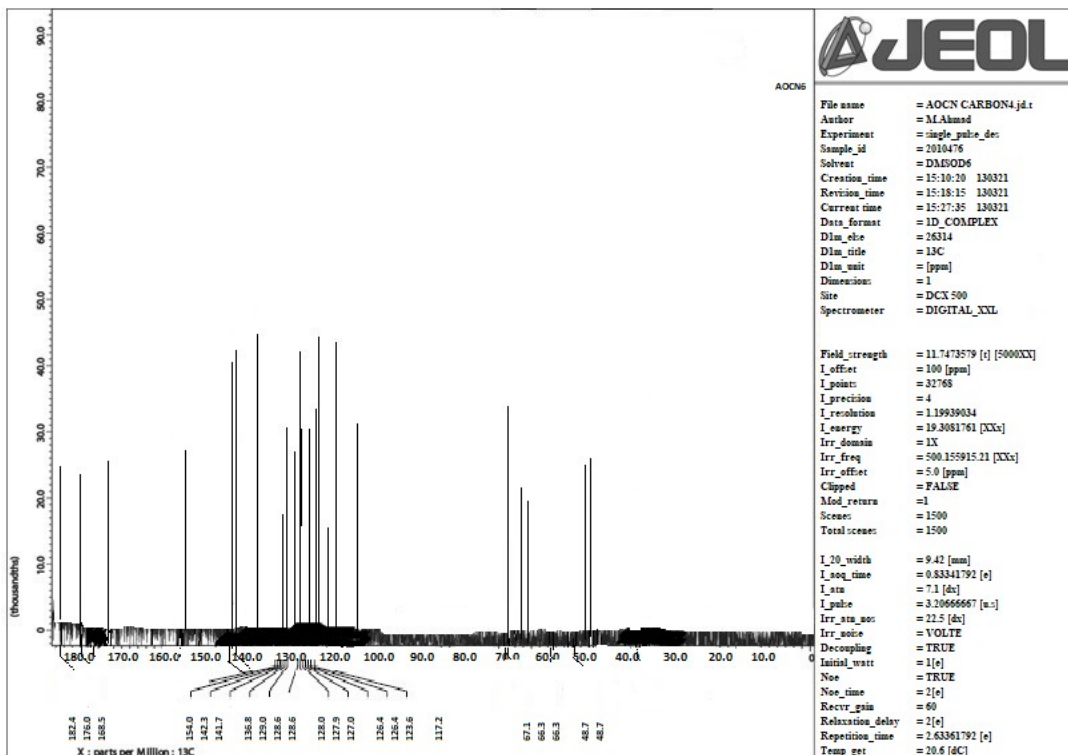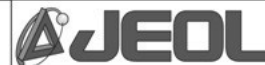

AOCN6

|               |                    |
|---------------|--------------------|
| File name     | = AOCN CARBON4.jdt |
| Author        | = M.Akmod          |
| Experiment    | = single_pulse_de  |
| Sample_id     | = 2010476          |
| Solvent       | = DMSOD6           |
| Creation_time | = 15:10:20 130321  |
| Revision_time | = 15:18:15 130321  |
| Current_time  | = 15:27:35 130321  |
| Data_format   | = ID_COMPLEX       |
| Dlm_cde       | = 26314            |
| Dlm_tide      | = 13C              |
| Dlm_unit      | = [ppm]            |
| Dimension     | = 1                |
| Site          | = DCX 500          |
| Spectrometer  | = DIGITAL XXL      |

|                  |                          |
|------------------|--------------------------|
| Field_strength   | = 11.747879 [t] [5000XX] |
| L_offset         | = 100 [ppm]              |
| L_point          | = 32768                  |
| L_precision      | = 4                      |
| L_resolution     | = 1.19839034             |
| L_energy         | = 19.3061741 [XXs]       |
| Irr_domain       | = 1X                     |
| Irr_freq         | = 500.15591521 [XXs]     |
| Irr_offset       | = 5.0 [ppm]              |
| Clipped          | = FALSE                  |
| Mod_return       | = 1                      |
| Scenes           | = 1500                   |
| Total_scenes     | = 1500                   |
| L20_width        | = 9.42 [mm]              |
| L20q_time        | = 0.83341792 [e]         |
| L20s             | = 7.1 [dc]               |
| L20pbe           | = 3.20666667 [u-s]       |
| Irr_sqr_sqr      | = 22.5 [db]              |
| Irr_noise        | = VOLTE                  |
| Decoupling       | = TRUE                   |
| Initial_wat      | = 1[e]                   |
| Noe              | = TRUE                   |
| Noe_time         | = 2[e]                   |
| Recvr_gain       | = 60                     |
| Relaxation_delay | = 2[e]                   |
| Repetition_time  | = 2.63361792 [e]         |
| Temp_get         | = 20.6 [dC]              |

# Compound 8 (g)

Analyst  
Date

SAIF, CSIR-CDRI, LKO  
Monday, December 06, 2021 11:38 AM

PerkinElmer Spectrum Version 10.03.06  
Monday, December 06, 2021 11:38 AM

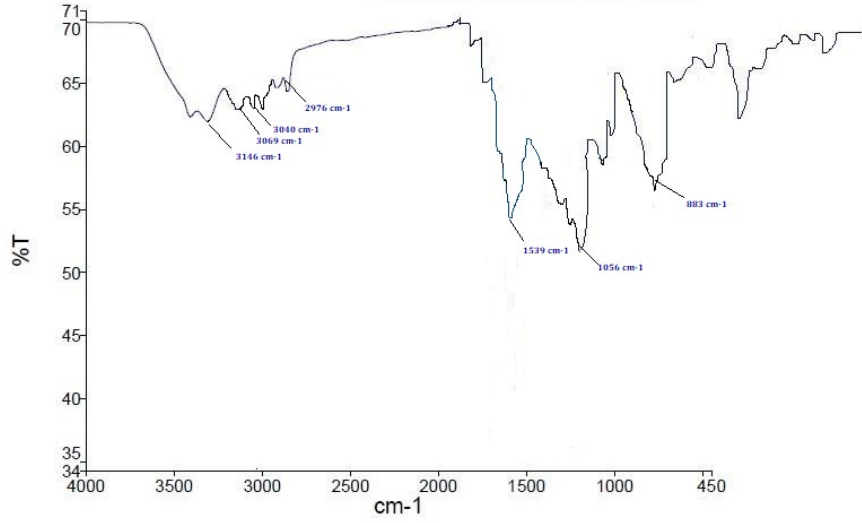

dharmesh 256\_ Sample  
IR20E09DEC02  
2010476 A017 By  
dharmesh Date  
Monday  
December 06 2021





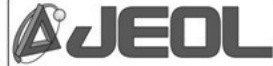

AOCN7

File name = AOCN CARBON4.jdt  
Author = M.Ahmad  
Experiment = single\_pulse\_det  
Sample\_id = 2010476  
Solvent = DMSOD6  
Creation\_time = 15:29:20 130311  
Revision\_time = 15:38:12 130311  
Current\_time = 15:46:20 130311  
Data\_format = 1D\_COMPLEX  
Dia\_eht = 26314  
Dia\_tilt = 13C  
Dia\_unit = [ppm]  
Dimension = 1  
Site = DCX 500  
Spectrometer = DIGITAL XXL

Field\_strength = 11.7473579 [t] [5000XX]  
L\_offset = 100 [ppm]  
L\_point = 32768  
L\_precision = 4  
L\_resolution = 1.19939034  
L\_energy = 19.3081761 [XXs]  
Irr\_domain = 1X  
Irr\_freq = 500.155915.21 [XXs]  
Irr\_offset = 5.0 [ppm]  
Clipped = FALSE  
Mod\_return = 1  
Scans = 1500  
Total\_scans = 1500  
  
I\_20\_width = 9.42 [mm]  
I\_sac\_time = 0.83341792 [s]  
I\_sta = 7.1 [ds]  
I\_pabe = 3.20666667 [m.s]  
Irr\_sta\_sos = 22.5 [ds]  
Irr\_noise = VOLTE  
Decoupling = TRUE  
Initial\_wait = 1[s]  
Noe = TRUE  
Noe\_time = 2[s]  
Recv\_gain = 60  
Relaxation\_delay = 2[s]  
Repetition\_time = 2.63361792 [s]  
Temp\_set = 29.6 [dC]

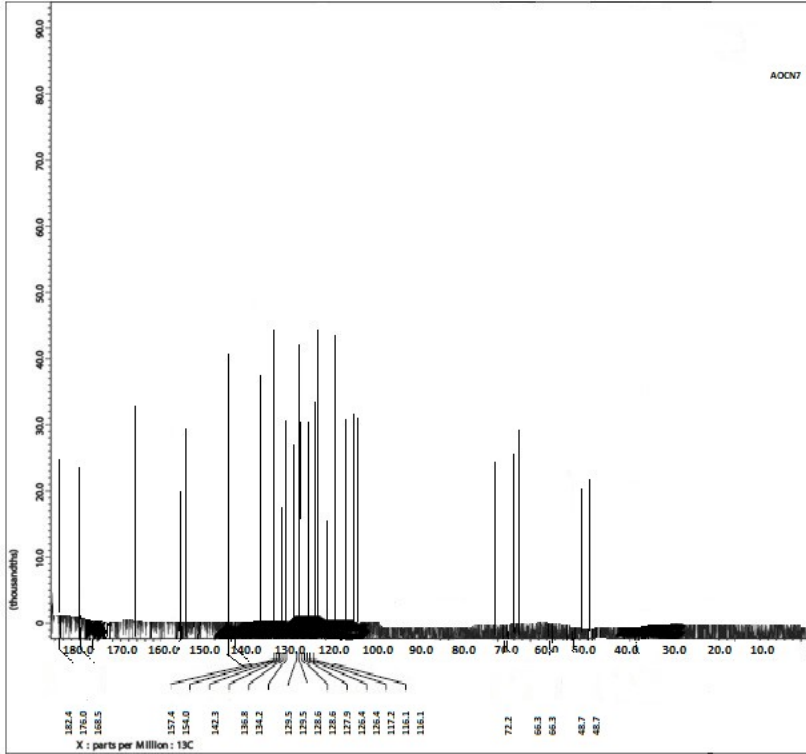



|               |                   |             |             |                 |              |                        |                        |
|---------------|-------------------|-------------|-------------|-----------------|--------------|------------------------|------------------------|
| Sample Name   | Alarika (2010476) | Position    | Vial 1      | Instrument Name | Instrument 1 | User Name              |                        |
| Inj Vol       | 3                 | InjPosition |             | SampleType      | Sample       | IRH Calibration Status | Success                |
| Data Filename | AOM8              | Acq Method  | ISOCRATIC.m | Comment         |              | Acquired Time          | 10/12/2021 11:54:19 AM |

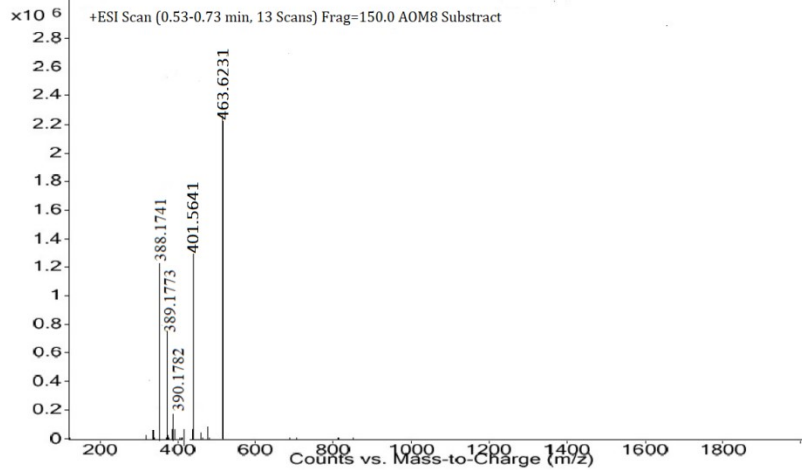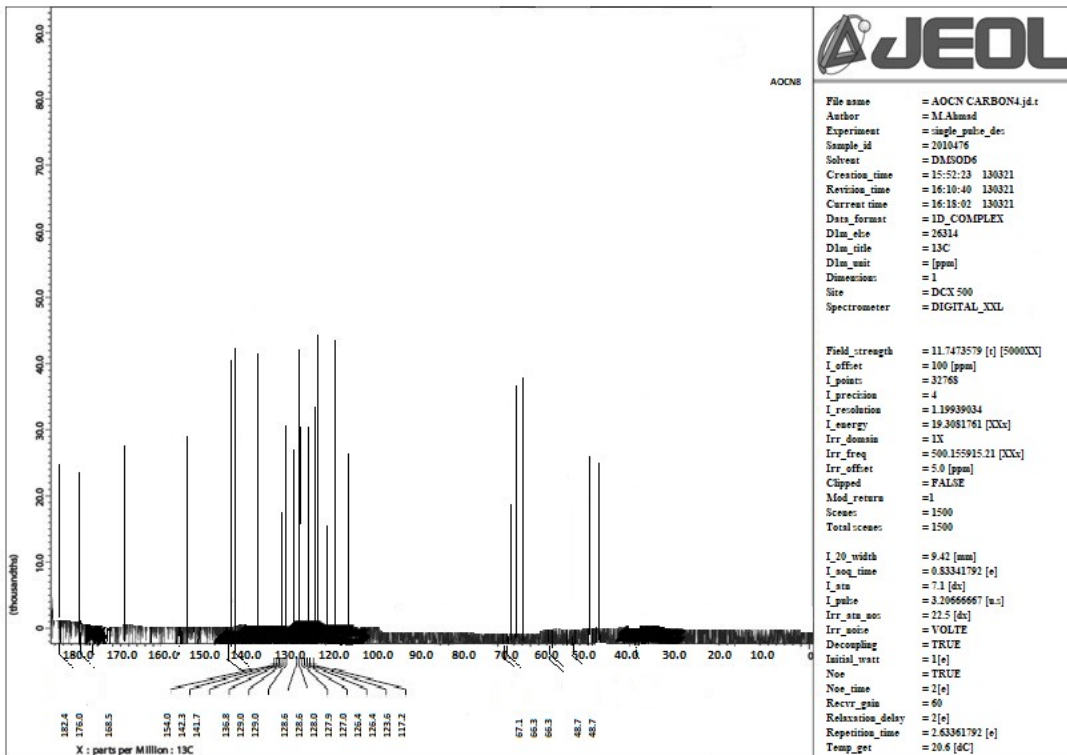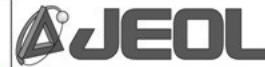

AOCN8

|               |                    |
|---------------|--------------------|
| File name     | = AOCN CARBON4.jdt |
| Author        | = M.Ahmad          |
| Experiment    | = single_pulse_de  |
| Sample_id     | = 2010476          |
| Solvent       | = DMSOD6           |
| Creation_time | = 15:52:23 130321  |
| Revision_time | = 16:10:40 130321  |
| Current time  | = 16:18:02 130321  |
| Data_format   | = 1D_COMPLEX       |
| Dlm_ole       | = 26314            |
| Dlm_title     | = 13C              |
| Dlm_unit      | = [ppm]            |
| Dimension     | = 1                |
| Site          | = DCX 500          |
| Spectrometer  | = DIGITAL XXL      |

|                  |                           |
|------------------|---------------------------|
| Field_strength   | = 11.7473579 [t] [5000XX] |
| L_offset         | = 100 [ppm]               |
| L_p0             | = 21765                   |
| L_precision      | = 4                       |
| L_resolution     | = 1.19939034              |
| L_energy         | = 19.3081761 [XXz]        |
| Irr_domain       | = 1X                      |
| Irr_freq         | = 500.15591521 [XXz]      |
| Irr_offset       | = 5.0 [ppm]               |
| Clipped          | = FALSE                   |
| Mod_return       | = 1                       |
| Scans            | = 1500                    |
| Total_scans      | = 1500                    |
| L_20_width       | = 9.42 [mm]               |
| L_acq_time       | = 0.83341792 [e]          |
| L_sra            | = 7.1 [dt]                |
| L_pulse          | = 3.20666667 [u:]         |
| Irr_sra_pos      | = 22.5 [dt]               |
| Irr_noise        | = VOLTE                   |
| Decoupling       | = TRUE                    |
| Initial_watr     | = 1[e]                    |
| Noe              | = TRUE                    |
| Noe_time         | = 2[e]                    |
| Recvr_gain       | = 60                      |
| Relaxation_delay | = 2[e]                    |
| Repetition_time  | = 2.63361792 [e]          |
| Temp_get         | = 20.6 [dC]               |

# Compound 8 (i)

Analyst  
Date

SAIF, CSIR-CDRI, LKO  
Monday, December 06, 2021 11:52 AM

PerkinElmer Spectrum Version 10.03.06  
Monday, December 06, 2021 11:52 AM

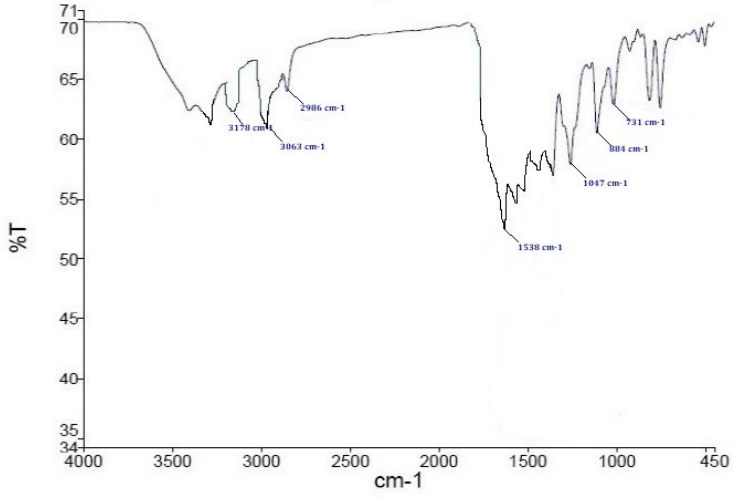

dharmesh 256 - Sample  
IR20E09DEC02  
2010476 A019 By  
dharmesh Date  
Monday  
December 06 2021

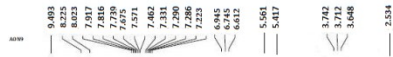

```

NAME 1274.A.MS
EXPNO 1
PROCNO 1
Date_ 20201208
Time 15:08
INSTRUM spect
PROBHD 5 mm QNP 1H/1
PULPROG zgpg30
TD 65536
SFO 400
AQ 0.500
RG 327.5
DE 0.150
TE 300.2
F2 -
F3 -
F4 -
F5 -
F6 -
F7 -
F8 -
F9 -
F10 -
F11 -
F12 -
F13 -
F14 -
F15 -
F16 -
F17 -
F18 -
F19 -
F20 -
F21 -
F22 -
F23 -
F24 -
F25 -
F26 -
F27 -
F28 -
F29 -
F30 -
F31 -
F32 -
F33 -
F34 -
F35 -
F36 -
F37 -
F38 -
F39 -
F40 -
F41 -
F42 -
F43 -
F44 -
F45 -
F46 -
F47 -
F48 -
F49 -
F50 -
F51 -
F52 -
F53 -
F54 -
F55 -
F56 -
F57 -
F58 -
F59 -
F60 -
F61 -
F62 -
F63 -
F64 -
F65 -
F66 -
F67 -
F68 -
F69 -
F70 -
F71 -
F72 -
F73 -
F74 -
F75 -
F76 -
F77 -
F78 -
F79 -
F80 -
F81 -
F82 -
F83 -
F84 -
F85 -
F86 -
F87 -
F88 -
F89 -
F90 -
F91 -
F92 -
F93 -
F94 -
F95 -
F96 -
F97 -
F98 -
F99 -
F100 -

```

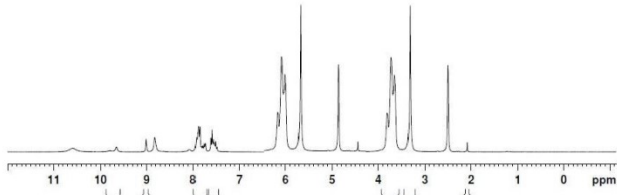

| Sample Name   | Akanisha (2010476) | Position     | Vial 1      | Instrument Name | Instrument 1 | User Name              | IRM Calibration Status | Success                |
|---------------|--------------------|--------------|-------------|-----------------|--------------|------------------------|------------------------|------------------------|
| Inj Vol       | 3                  | Inj Position |             | Sample Type     | Sample       | IRM Calibration Status |                        |                        |
| Data Filename | AOM9               | ACQ Method   | ISOCRATIC.m | Comment         |              | Acquired Time          |                        | 10/12/2021 11:53:57 AM |

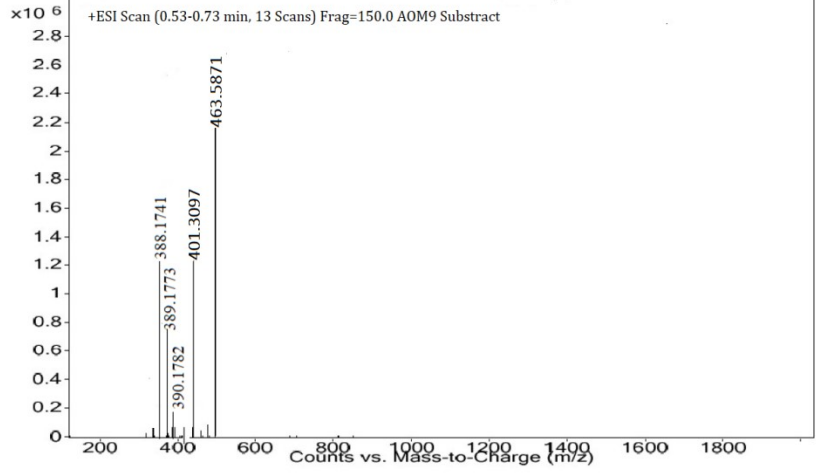

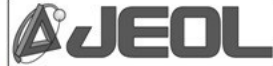

AOCN9

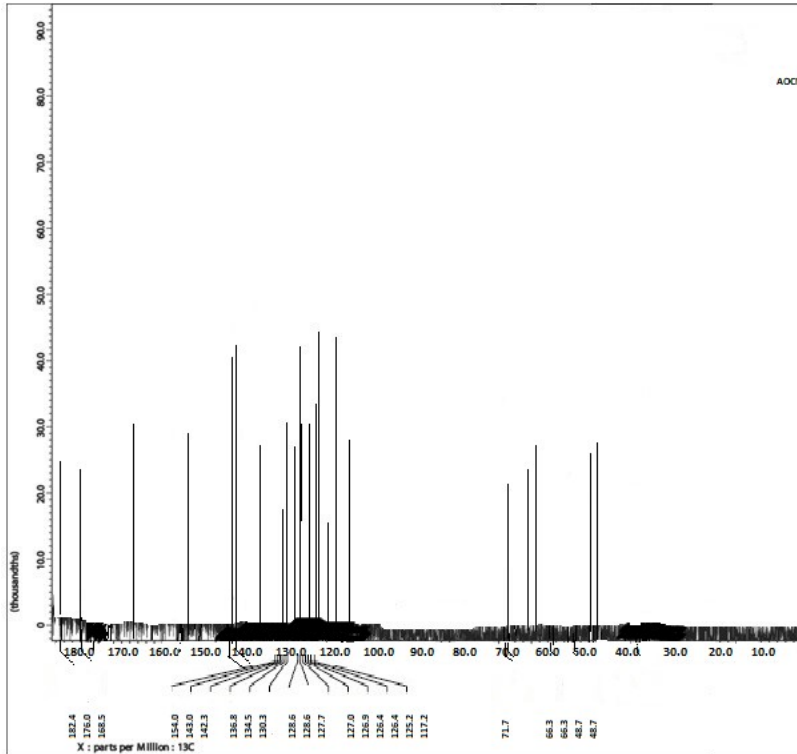

File name = AOCN CARBON4.jd.r  
Author = M.Akmal  
Experiment = single\_pulse\_dec  
Sample\_id = 2010476  
Solvent = DMSOD6  
Creation\_time = 16:13:10 130321  
Revision\_time = 16:31:16 130321  
Current\_time = 16:42:40 130321  
Data\_format = 1D\_COMPLEX  
Dia\_ehe = 26314  
Dia\_title = 13C  
Dia\_unit = [ppm]  
Dimension = 1  
Site = DCX 500  
Spectrometer = DIGITAL XXL

Field\_strength = 11.7473579 [t] [5000XX]  
F\_offset = 100 [ppm]  
F\_point = 32765  
F\_precision = 4  
F\_resolution = 1.19939034  
F\_energy = 19.3061761 [XXs]  
Irr\_domain = 1X  
Irr\_freq = 500.155915.21 [XXs]  
Irr\_offset = 5.0 [ppm]  
Cropped = FALSE  
Mod\_return = 1  
Scans = 1500  
Total\_scans = 1500

I\_20\_width = 9.42 [mm]  
I\_ssq\_time = 0.83341792 [e]  
I\_sta = 7.1 [ds]  
I\_pulse = 3.20666667 [u.s]  
Irr\_sta\_soc = 22.5 [ds]  
Irr\_socie = VOLTE  
Decoupling = TRUE  
Initial\_wact = 1[e]  
Noe = TRUE  
Noe\_time = 2[e]  
Recvr\_gain = 60  
Relaxation\_delay = 2[e]  
Repetition\_time = 2.63361792 [e]  
Temp\_get = 20.6 [dC]





|               |                   |              |             |                 |              |                        |                        |
|---------------|-------------------|--------------|-------------|-----------------|--------------|------------------------|------------------------|
| Sample Name   | Alarika (2010476) | Position     | Vial 1      | Instrument Name | Instrument 1 | User Name              |                        |
| Inj Vol       | 3                 | Inj Position |             | Sample Type     | Sample       | IRH Calibration Status | Success                |
| Data Filename | AOM10             | ACQ Method   | ISOCRATIC.m | Comment         |              | Acquired Time          | 10/12/2021 11:46:12 AM |

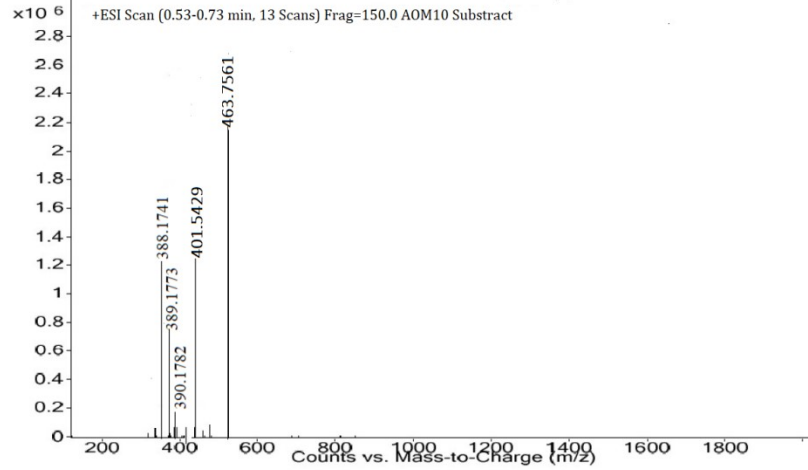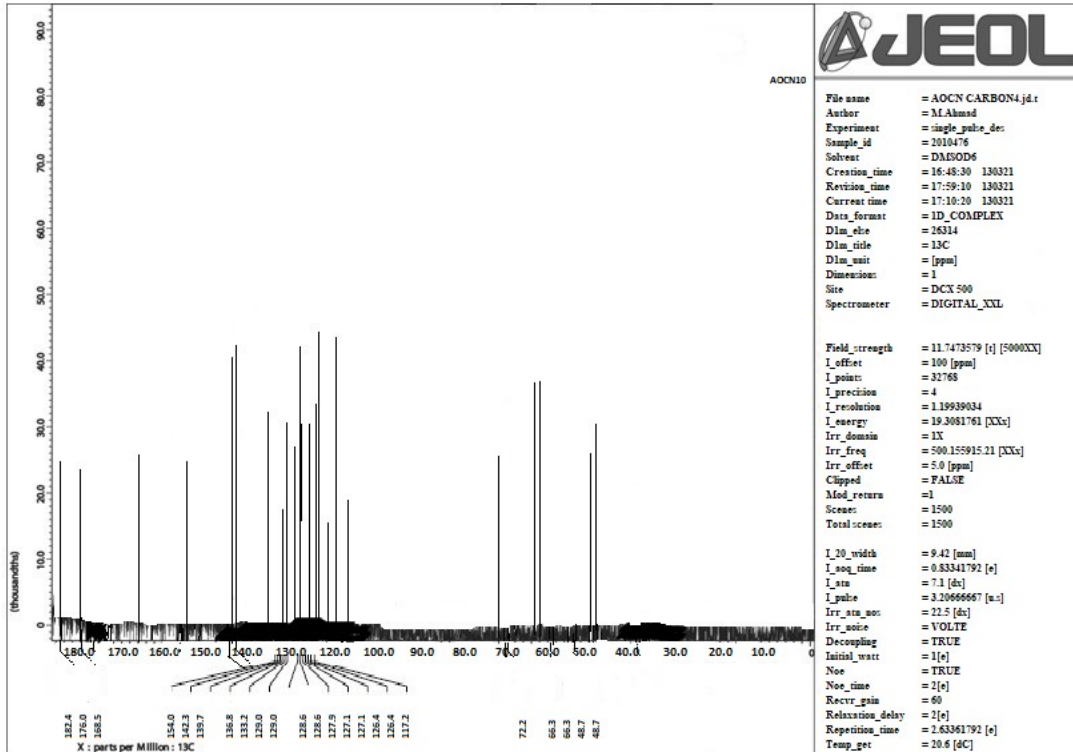



|               |                    |             |             |                 |              |                        |                       |
|---------------|--------------------|-------------|-------------|-----------------|--------------|------------------------|-----------------------|
| Sample Name   | Alankaha (2010476) | Position    | Vial 1      | Instrument Name | Instrument 1 | User Name              |                       |
| Inj Vol       | 3                  | InjPosition |             | Sample Type     | Sample       | IRM Calibration Status | Success               |
| Data Filename | AOM11              | ACQ Method  | ISOCRATIC.m | Comment         |              | Acquired Time          | 10/12/2021 11:15:57AM |

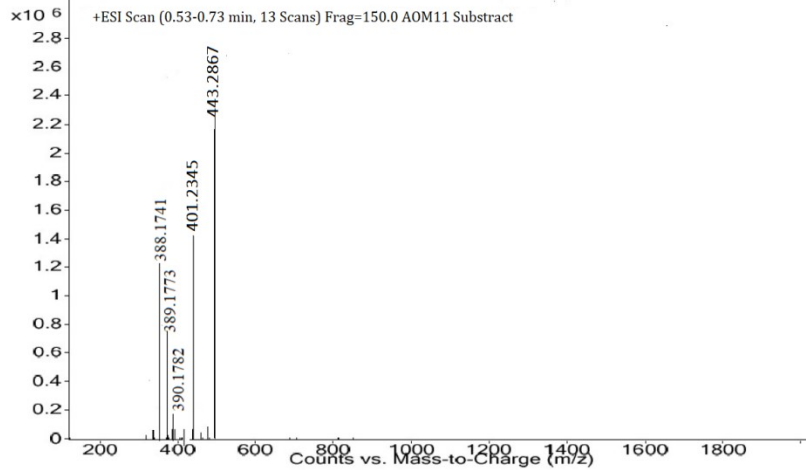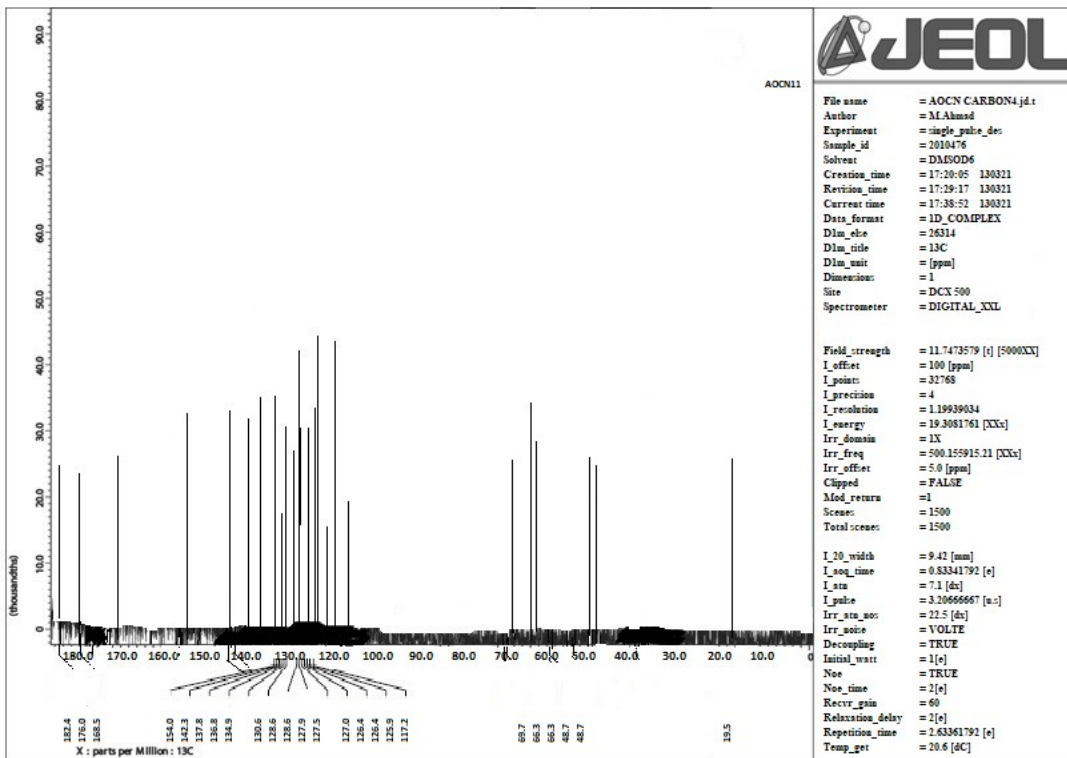



|               |                   |              |             |                 |              |                        |                        |
|---------------|-------------------|--------------|-------------|-----------------|--------------|------------------------|------------------------|
| Sample Name   | Alarika (2010476) | Position     | Vial 1      | Instrument Name | Instrument 1 | User Name              |                        |
| Inj Vol       | 3                 | Inj Position |             | Sample Type     | Sample       | IRH Calibration Status | Success                |
| Data Filename | AOM12             | ACQ Method   | ISOCRATIC.m | Comment         |              | Acquired Time          | 10/12/2021 11:42:15 AM |

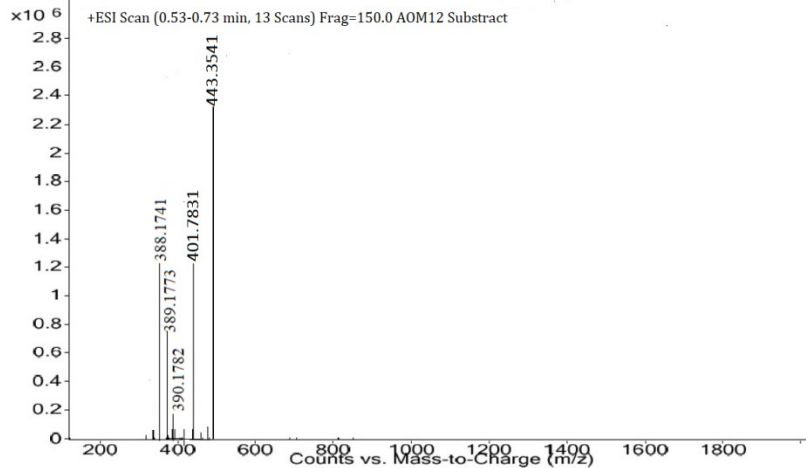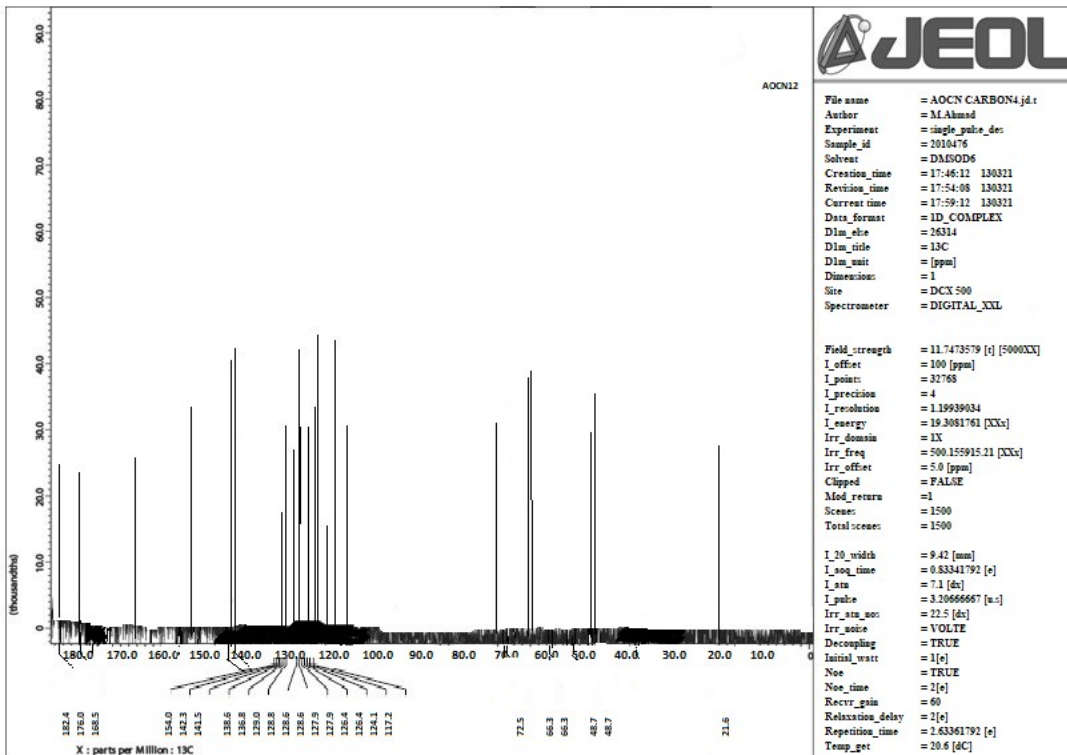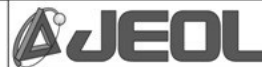

AOCN12

File name = AOCN CARBON4.jd.t  
 Author = M.Akmsd  
 Experiment = single\_pulse\_de  
 Sample\_id = 2010476  
 Solvent = DMSO-D6  
 Creation\_time = 17:46:12 130321  
 Revision\_time = 17:54:08 130321  
 Current\_time = 17:59:12 130321  
 Data\_format = 1D\_COMPLEX  
 Dia\_eht = 26314  
 Dia\_title = 13C  
 Dia\_unit = [ppm]  
 Dimensions = 1  
 Site = DCX 500  
 Spectrometer = DIGITAL XXL

Field\_strength = 11.743579 [e] (500MHz)  
 L\_offset = 100 [ppm]  
 L\_point = 32768  
 L\_precision = 4  
 L\_resolution = 1.19939034  
 L\_energy = 19.3081761 [XXe]  
 Irr\_domain = 1X  
 Irr\_freq = 500.15591521 [XXe]  
 Irr\_offset = 5.0 [ppm]  
 Clipped = FALSE  
 Mod\_return = 1  
 Scenes = 1500  
 Total\_scenes = 1500  
 L\_20\_width = 9.42 [mm]  
 L\_sqr\_time = 0.83341792 [e]  
 L\_atn = 7.1 [db]  
 L\_pulse = 3.20666667 [u.s]  
 Irr\_atn\_pos = 22.5 [db]  
 Irr\_noise = VOLTE  
 Decoupling = TRUE  
 Initial\_watr = 1[e]  
 Noe = TRUE  
 Noe\_time = 2[e]  
 Recvr\_gain = 60  
 Relaxation\_delay = 2[e]  
 Repetition\_time = 1.63361792 [e]  
 Temp\_get = 20.6 [dC]

# Compound 8 (m)

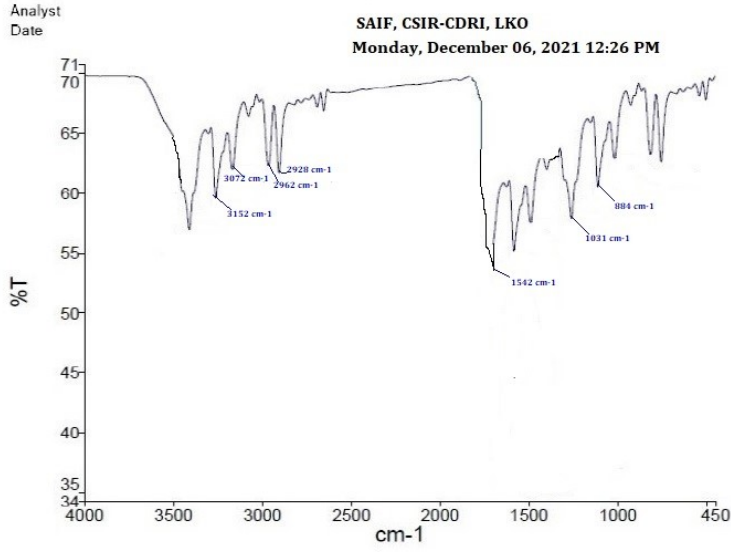

dharmesh 256 - Sample  
IR20E09DEC02  
2010476 A0113 By  
dharmesh Date  
Monday  
December 06 2021

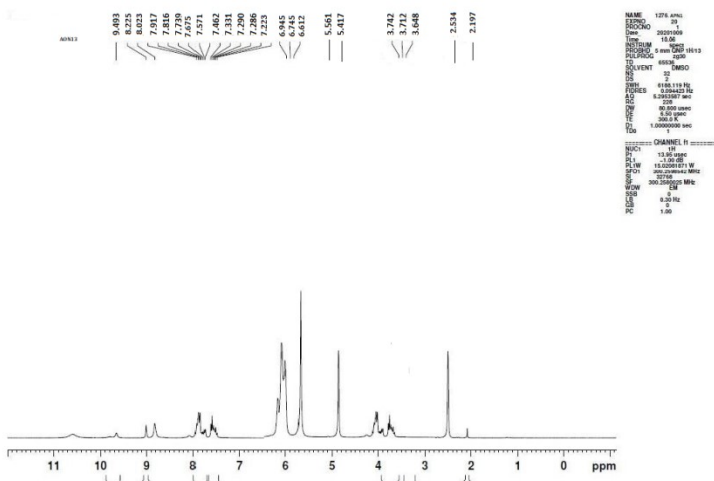

```

NAME 1274.A.MU
EXPNO 1
PROCNO 1
PROCDS 20207008
Date_ 15.08
INSTRUM spect
PROBHD 5 mm QNP 1H/13
PULPROG zgpg30
TD 65536
SFO 400
AQ 0.50000000
RG 1024
DS 4
F2 -
F3 -
F4 -
F5 -
F6 -
F7 -
F8 -
F9 -
F10 -
F11 -
F12 -
F13 -
F14 -
F15 -
F16 -
F17 -
F18 -
F19 -
F20 -
F21 -
F22 -
F23 -
F24 -
F25 -
F26 -
F27 -
F28 -
F29 -
F30 -
F31 -
F32 -
F33 -
F34 -
F35 -
F36 -
F37 -
F38 -
F39 -
F40 -
F41 -
F42 -
F43 -
F44 -
F45 -
F46 -
F47 -
F48 -
F49 -
F50 -
F51 -
F52 -
F53 -
F54 -
F55 -
F56 -
F57 -
F58 -
F59 -
F60 -
F61 -
F62 -
F63 -
F64 -
F65 -
F66 -
F67 -
F68 -
F69 -
F70 -
F71 -
F72 -
F73 -
F74 -
F75 -
F76 -
F77 -
F78 -
F79 -
F80 -
F81 -
F82 -
F83 -
F84 -
F85 -
F86 -
F87 -
F88 -
F89 -
F90 -
F91 -
F92 -
F93 -
F94 -
F95 -
F96 -
F97 -
F98 -
F99 -
F100 -

```

| Sample Name   | Akanisha (2010476) | Position    | Vial 1      | Instrument Name | Instrument 1 | User Name              |                        |
|---------------|--------------------|-------------|-------------|-----------------|--------------|------------------------|------------------------|
| Inj Vol       | 3                  | InjPosition |             | SampleType      | Sample       | IRM Calibration Status | Success                |
| Data Filename | AOM13              | ACQ Method  | ESOCRATIC.m | Comment         |              | Acquired Time          | 10/12/2021 11:58:45 AM |

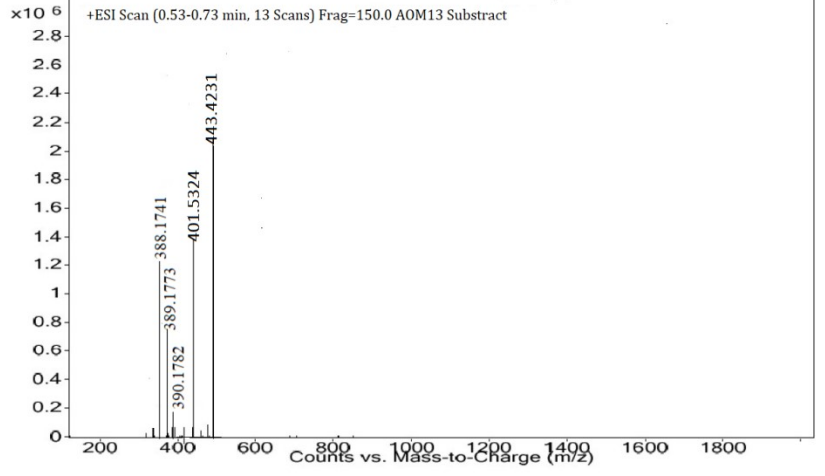

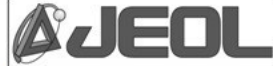

AOCN13

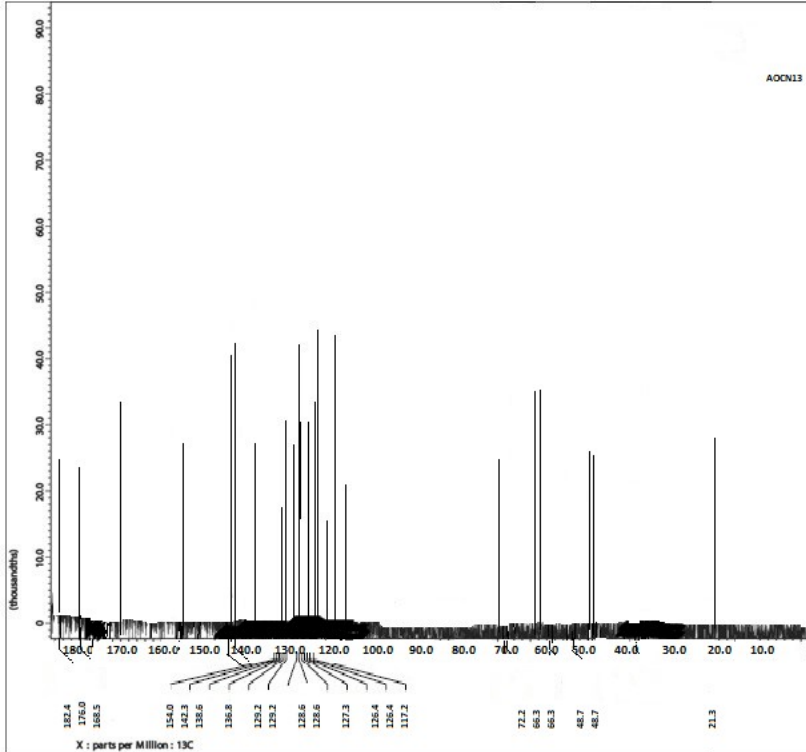

File name = AOCN CARBON4.jd.  
Author = M.Ahmed  
Experiment = single\_pulse\_dec  
Sample\_id = 2010476  
Solvent = DMSOD6  
Creation\_time = 18:12:20 130321  
Revision\_time = 18:22:06 130321  
Current\_time = 18:29:12 130321  
Data\_format = 1D\_COMPLEX  
Dim\_elec = 26314  
Dim\_nucl = 13C  
Dim\_unit = [ppm]  
Dimension = 1  
Site = DCX-500  
Spectrometer = DIGITAL\_XXL

Field\_strength = 11.7473579 [e] [500MHz]  
L\_offset = 100 [ppm]  
L\_point = 32768  
L\_precision = 4  
L\_resolution = 1.19939034  
L\_energy = 19.3081761 [XXe]  
Irr\_domain = 1X  
Irr\_freq = 500.15591511 [XXe]  
Irr\_offset = 5.0 [ppm]  
Clipped = FALSE  
Mod\_return = 1  
Scenes = 1500  
Total\_scenes = 1500

L\_20\_width = 9.42 [mm]  
L\_soc\_time = 0.83341792 [e]  
L\_sca = 7.1 [dx]  
L\_pulse = 3.20666667 [u.s]  
Irr\_pwr\_wgt = 22.5 [dc]  
Irr\_pwr = VOLTE  
Decoupling = TRUE  
Initial\_watr = 1[e]  
Noe = TRUE  
Noe\_time = 2[e]  
Recvr\_gain = 60  
Relaxation\_delay = 2[e]  
Repetition\_time = 2.63361792 [e]  
Temp\_get = 20.6 [dC]
